# Supplementary material for: Single-cell-type quantitative proteomic and ionomic analysis of epidermal bladder cells from the halophyte model plant Mesembryanthemum crystallinum to identify salt-responsive proteins
Source: PubMed Central journal article supplement (PMC4862212; doi:10.1186/s12870-016-0797-1), 2016-05-10
Supplement: 12870_2016_797_MOESM1_ESM.pdf [file 12870_2016_797_MOESM1_ESM.pdf]

**A.**

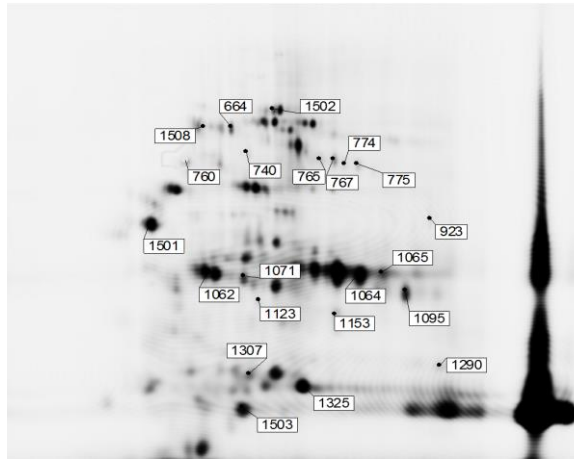

**B.**

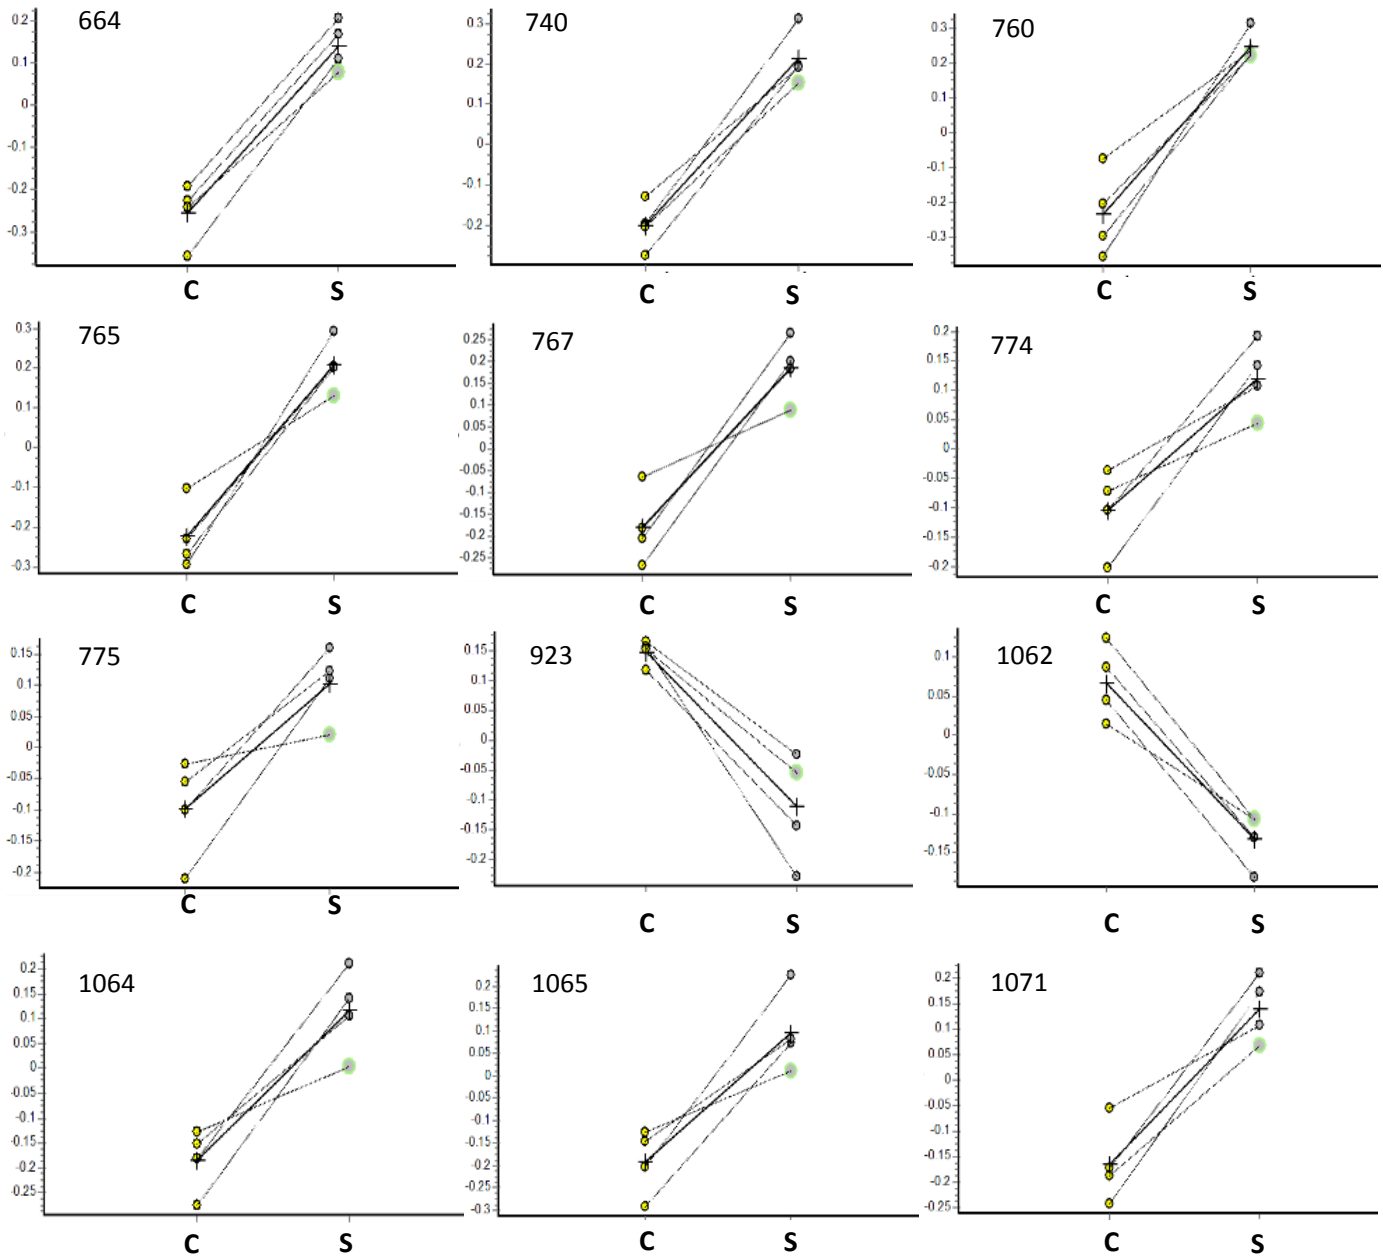

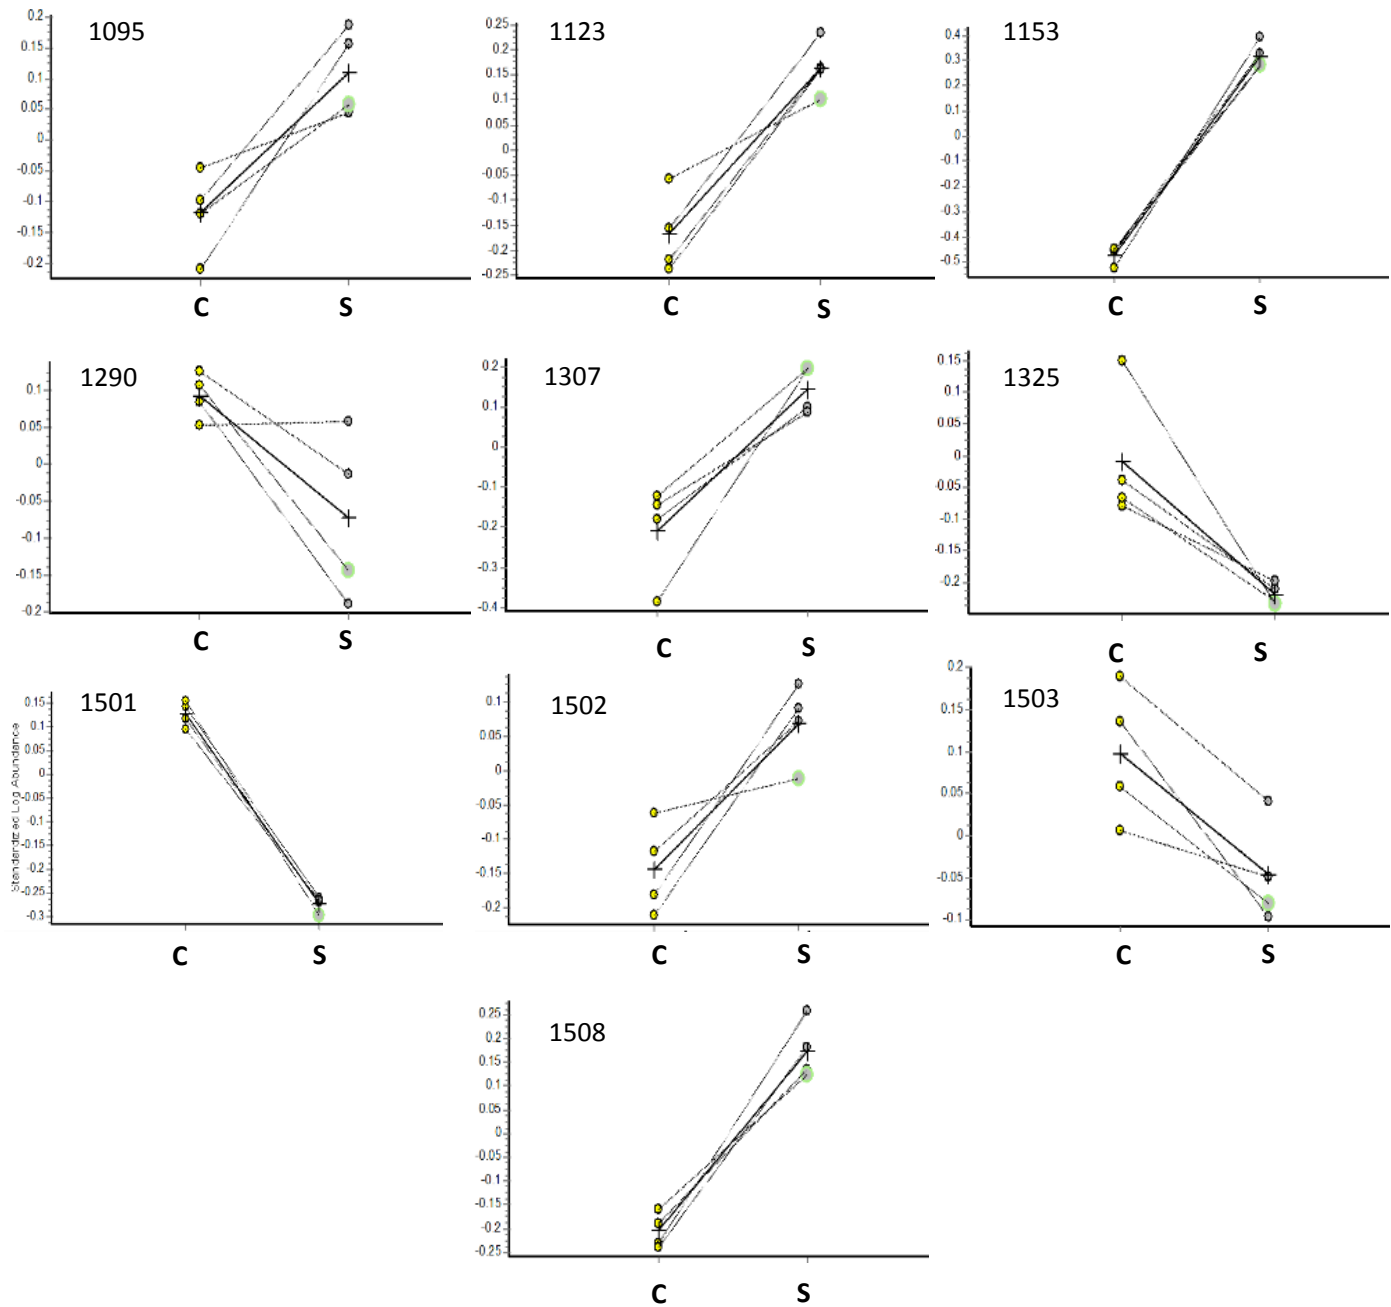

**Additional file 1.** 2D-DIGE analysis of EBC proteins to identify salt-responsive proteins. (A) A

representative multi-plexed gel of EBC proteins from control and salt-treated EBC. Protein was separated by isoelectric focusing on 3 to 10 linear immobilized pH gradient strips for the first dimension and by SDS-PAGE on a 10% linear acrylamide gel for the second dimension and stained with SyproRuby. Differentially expressed proteins are labelled with the respective spot number. (B) Graphical representation of the standardized log abundance (i.e., log abundance of Cy3- or Cy5-labeled spot over log abundance of Cy2-labeled standard spot) of the protein spots that showed significant changes in abundance between the untreated and salt-treated samples after analysis with Decyder Software. Individual dashed lines show each of the four biological replicates from untreated (C) and salt-treated (S) replicate samples. The solid line represents the average of the four biological replicates.
