# Supplementary material for: Single-cell-type quantitative proteomic and ionomic analysis of epidermal bladder cells from the halophyte model plant Mesembryanthemum crystallinum to identify salt-responsive proteins
Source: PubMed Central journal article supplement (PMC4862212; doi:10.1186/s12870-016-0797-1), 2016-05-10
Supplement: 12870_2016_797_MOESM2_ESM.pdf [file 12870_2016_797_MOESM2_ESM.pdf]

Additional file 2. Additional information for peptides and proteins identified in the DIGE ana

| Spot #            | Protein Name          | Accession #  | Protein M.W. | Protein Identification Probability | Exclusive unique peptide count | Percentage Sequence Coverage | Peptide Sequence <sup>a</sup>         | Best Peptide Identification Probability | Best Mascot Ion Score | Best Mascot Identity Score | Best Mascot Delta Ion Score | Number of Identified +1H spectra | Number of Identified +2H spectra | Number of Identified +3H spectra | Number of Identified +4H spectra |      |      |      |   |   |   |   |
|-------------------|-----------------------|--------------|--------------|------------------------------------|--------------------------------|------------------------------|---------------------------------------|-----------------------------------------|-----------------------|----------------------------|-----------------------------|----------------------------------|----------------------------------|----------------------------------|----------------------------------|------|------|------|---|---|---|---|
| 664               | V-ATPase A subunit    | gi 13235340  | 68900        | 100.00%                            | 12                             | 22.90%                       | K.EFTMLQSWPVR.T                       | 97.50%                                  | 45.4                  | 43.4                       | 23.4                        | 0                                | 1                                | 0                                | 0                                |      |      |      |   |   |   |   |
|                   |                       |              |              |                                    |                                |                              | K.KIGEGDLLTGGDLYAK.V                  | 99.70%                                  | 78.1                  | 42.1                       | 61.9                        | 0                                | 1                                | 0                                | 0                                |      |      |      |   |   |   |   |
|                   |                       |              |              |                                    |                                |                              | K.LAADTPLLTGQR.V                      | 99.70%                                  | 76.7                  | 39.2                       | 53                          | 0                                | 3                                | 0                                | 0                                |      |      |      |   |   |   |   |
|                   |                       |              |              |                                    |                                |                              | R.LAEMPADSGYPAYLAAR.L                 | 99.70%                                  | 64.4                  | 44.1                       | 40.5                        | 0                                | 1                                | 0                                | 0                                |      |      |      |   |   |   |   |
|                   |                       |              |              |                                    |                                |                              | R.LASFYER.A                           | 95.80%                                  | 44.5                  | 40.7                       | 15.5                        | 0                                | 1                                | 0                                | 0                                |      |      |      |   |   |   |   |
|                   |                       |              |              |                                    |                                |                              | R.LGDLFYR.L                           | 99.30%                                  | 45.2                  | 40.8                       | 14.6                        | 0                                | 2                                | 0                                | 0                                |      |      |      |   |   |   |   |
|                   |                       |              |              |                                    |                                |                              | R.LVSQKFEDPAEGEDTLVAK.F               | 99.70%                                  | 57.3                  | 44.5                       | 21.2                        | 0                                | 0                                | 2                                | 0                                |      |      |      |   |   |   |   |
|                   |                       |              |              |                                    |                                |                              | K.LYEDLSAAFR.N                        | 99.70%                                  | 72.1                  | 41.9                       | 31.1                        | 0                                | 2                                | 0                                | 0                                |      |      |      |   |   |   |   |
|                   |                       |              |              |                                    |                                |                              | R.SGDVYIPR.G                          | 99.60%                                  | 49.3                  | 41                         | 18.3                        | 0                                | 2                                | 0                                | 0                                |      |      |      |   |   |   |   |
|                   |                       |              |              |                                    |                                |                              | R.TTLVANTSNMPVAAR.E                   | 99.70%                                  | 104                   | 43.4                       | 75.6                        | 0                                | 1                                | 0                                | 0                                |      |      |      |   |   |   |   |
|                   |                       |              |              |                                    |                                |                              | K.TVISQALSK.Y                         | 98.70%                                  | 47.2                  | 39.5                       | 18                          | 0                                | 2                                | 0                                | 0                                |      |      |      |   |   |   |   |
|                   |                       |              |              |                                    |                                |                              | R.VGYDNLIGEIIIR.L                     | 99.70%                                  | 76.3                  | 41.3                       | 46.8                        | 0                                | 2                                | 0                                | 0                                |      |      |      |   |   |   |   |
|                   |                       |              |              |                                    |                                |                              | 740a                                  | Ferredoxin--nitrite reductase           | gi 255555453          | 65991                      | 100.00%                     | 4                                | 7.84%                            | R.AMKVTEEVQR.L                   | 98.20%                           | 39   | 42.2 | 19.2 | 0 | 0 | 1 | 0 |
|                   |                       |              |              |                                    |                                |                              |                                       |                                         |                       |                            |                             |                                  |                                  | R.GVVLSDPDILK.G                  | 99.70%                           | 63.6 | 38.6 | 47.5 | 0 | 2 | 0 | 0 |
| R.IGSDSHLGDVYKK.S | 95.70%                | 43.3         | 42.6         | 22.4                               | 0                              | 1                            |                                       |                                         |                       |                            |                             |                                  |                                  | 0                                | 0                                |      |      |      |   |   |   |   |
| R.VQADDMDDELAR.L  | 99.70%                | 55.8         | 41.9         | 27.1                               | 0                              | 2                            |                                       |                                         |                       |                            |                             |                                  |                                  | 0                                | 0                                |      |      |      |   |   |   |   |
| 740b              | Beta-hexosaminidase 1 | gi 110742769 | 61231        | 100.00%                            | 3                              | 3.14%                        | R.GLLIDTSR.H                          | 98.30%                                  | 47.7                  | 42.3                       | 0                           | 0                                | 3                                | 0                                | 0                                |      |      |      |   |   |   |   |
|                   |                       |              |              |                                    |                                |                              | R.GLLIDTSRHYLPIDVIK.Q                 | 99.40%                                  | 40.8                  | 36.6                       | 27                          | 0                                | 0                                | 3                                | 0                                |      |      |      |   |   |   |   |
|                   |                       |              |              |                                    |                                |                              | R.HYLPIDVIK.Q                         | 97.40%                                  | 31.6                  | 37.2                       | 11.5                        | 0                                | 0                                | 2                                | 0                                |      |      |      |   |   |   |   |
| 760               | V-ATPase B subunit    | gi 26986106  | 54129        | 100.00%                            | 31                             | 73.90%                       | K.AVVGEEALSSDLLYLEFLDKFER.K           | 95.10%                                  | 41.1                  | 43.8                       | 30.8                        | 0                                | 0                                | 1                                | 0                                |      |      |      |   |   |   |   |
|                   |                       |              |              |                                    |                                |                              | K.AVVGEEALSSDLLYLEFLDKFERK.F          | 99.70%                                  | 44.7                  | 43                         | 33.1                        | 0                                | 0                                | 0                                | 2                                |      |      |      |   |   |   |   |
|                   |                       |              |              |                                    |                                |                              | K.AVVQVFEGTSGIDNK.Y                   | 99.70%                                  | 104                   | 42.9                       | 81.2                        | 0                                | 1                                | 0                                | 0                                |      |      |      |   |   |   |   |
|                   |                       |              |              |                                    |                                |                              | R.DFEENGSMER.V                        | 99.00%                                  | 46.4                  | 39                         | 32.1                        | 0                                | 2                                | 0                                | 0                                |      |      |      |   |   |   |   |
|                   |                       |              |              |                                    |                                |                              | R.DHSDVSNQLYANYAIGK.D                 | 99.70%                                  | 90.7                  | 45                         | 72.3                        | 0                                | 1                                | 0                                | 0                                |      |      |      |   |   |   |   |
|                   |                       |              |              |                                    |                                |                              | R.DHSDVSNQLYANYAIGKDVQAMK.A           | 99.70%                                  | 66.9                  | 45.9                       | 59                          | 0                                | 0                                | 2                                | 0                                |      |      |      |   |   |   |   |
|                   |                       |              |              |                                    |                                |                              | R.ELLHRIPAK.T                         | 98.80%                                  | 40                    | 34.8                       | 17.1                        | 0                                | 3                                | 0                                | 0                                |      |      |      |   |   |   |   |
|                   |                       |              |              |                                    |                                |                              | K.FVAQGAYDTR.T                        | 98.60%                                  | 56                    | 44.3                       | 32                          | 0                                | 3                                | 0                                | 0                                |      |      |      |   |   |   |   |
|                   |                       |              |              |                                    |                                |                              | M.GAPNNLEMDEGNLEIGMEYR.T              | 99.70%                                  | 53                    | 45                         | 30.1                        | 0                                | 0                                | 1                                | 0                                |      |      |      |   |   |   |   |
|                   |                       |              |              |                                    |                                |                              | R.GQKIPFSAAGLPHNEIAAQICR.Q            | 99.70%                                  | 60.5                  | 42.1                       | 46.6                        | 0                                | 0                                | 3                                | 3                                |      |      |      |   |   |   |   |
|                   |                       |              |              |                                    |                                |                              | R.GQVLEVDGEKAVVQVFEGTSGIDNK.Y         | 99.70%                                  | 69.2                  | 43.6                       | 0                           | 0                                | 0                                | 1                                | 0                                |      |      |      |   |   |   |   |
|                   |                       |              |              |                                    |                                |                              | R.GYPGYMYTDLATIYER.A                  | 99.70%                                  | 101                   | 44.6                       | 85.9                        | 0                                | 3                                | 0                                | 0                                |      |      |      |   |   |   |   |
|                   |                       |              |              |                                    |                                |                              | K.HVLVILTMSSYADALREVSAAAR.E           | 99.70%                                  | 52.2                  | 43.4                       | 43                          | 0                                | 0                                | 2                                | 1                                |      |      |      |   |   |   |   |
|                   |                       |              |              |                                    |                                |                              | R.IALTTAEYLAYECGK.H                   | 99.70%                                  | 107                   | 44.1                       | 83.7                        | 0                                | 3                                | 1                                | 0                                |      |      |      |   |   |   |   |
|                   |                       |              |              |                                    |                                |                              | R.IFNGSGKPIDNGPPILPEAYLDISGSSINPSER.T | 98.90%                                  | 44.6                  | 43.6                       | 30.2                        | 0                                | 0                                | 1                                | 0                                |      |      |      |   |   |   |   |
|                   |                       |              |              |                                    |                                |                              | K.IPLFSAAGLPHNEIAAQICR.Q              | 99.70%                                  | 69.1                  | 42.3                       | 59.3                        | 0                                | 0                                | 3                                | 0                                |      |      |      |   |   |   |   |
|                   |                       |              |              |                                    |                                |                              | R.KFVAQGAYDTR.T                       | 99.70%                                  | 56.3                  | 44.3                       | 30.4                        | 0                                | 1                                | 3                                | 0                                |      |      |      |   |   |   |   |
|                   |                       |              |              |                                    |                                |                              | R.QYPPINVLPLSLR.L                     | 99.40%                                  | 50.1                  | 38.4                       | 34.8                        | 0                                | 3                                | 0                                | 0                                |      |      |      |   |   |   |   |
|                   |                       |              |              |                                    |                                |                              | R.RDHSDVSNQLYANYAIGKDVQAMK.A          | 96.90%                                  | 41.8                  | 45.6                       | 23.5                        | 0                                | 0                                | 0                                | 2                                |      |      |      |   |   |   |   |
|                   |                       |              |              |                                    |                                |                              | R.RGQVLEVDGEK.A                       | 99.70%                                  | 76.3                  | 41.6                       | 0                           | 0                                | 2                                | 0                                | 0                                |      |      |      |   |   |   |   |
|                   |                       |              |              |                                    |                                |                              | R.RGQVLEVDGEKAVVQVFEGTSGIDNK.Y        | 99.70%                                  | 67.2                  | 42.9                       | 0                           | 0                                | 0                                | 2                                | 2                                |      |      |      |   |   |   |   |
|                   |                       |              |              |                                    |                                |                              | K.SAIGGMTR.R                          | 97.60%                                  | 48.7                  | 42.2                       | 27                          | 0                                | 2                                | 0                                | 0                                |      |      |      |   |   |   |   |
|                   |                       |              |              |                                    |                                |                              | R.TIFQSLDLAWTLR.I                     | 99.70%                                  | 103                   | 39                         | 87.5                        | 0                                | 3                                | 1                                | 0                                |      |      |      |   |   |   |   |
|                   |                       |              |              |                                    |                                |                              | K.TLDQYYSR.D                          | 97.80%                                  | 42.6                  | 42.1                       | 19.7                        | 0                                | 3                                | 0                                | 0                                |      |      |      |   |   |   |   |
|                   |                       |              |              |                                    |                                |                              | K.TPVSLDMLGR.I                        | 98.80%                                  | 54.7                  | 41.9                       | 0                           | 0                                | 1                                | 0                                | 0                                |      |      |      |   |   |   |   |
|                   |                       |              |              |                                    |                                |                              | R.TVSGVAGPLVILEK.V                    | 99.70%                                  | 76.5                  | 36.8                       | 58.8                        | 0                                | 3                                | 0                                | 0                                |      |      |      |   |   |   |   |
|                   |                       |              |              |                                    |                                |                              | R.TYPEEMIQTGISTIDVMNSIAR.G            | 99.70%                                  | 70.9                  | 45.9                       | 55.9                        | 0                                | 3                                | 3                                | 0                                |      |      |      |   |   |   |   |
|                   |                       |              |              |                                    |                                |                              | R.VTLFLNLANDPPTIER.I                  | 99.70%                                  | 95.3                  | 41                         | 13.6                        | 0                                | 3                                | 1                                | 0                                |      |      |      |   |   |   |   |
|                   |                       |              |              |                                    |                                |                              | K.YQEIVNIR.L                          | 99.70%                                  | 60.1                  | 41.2                       | 0                           | 0                                | 3                                | 0                                | 0                                |      |      |      |   |   |   |   |
|                   |                       |              |              |                                    |                                |                              | K.YTTVQFTGEVLK.T                      | 99.70%                                  | 83                    | 42.1                       | 62.2                        | 0                                | 1                                | 0                                | 0                                |      |      |      |   |   |   |   |

|     |                             |           |       |         |    |                                            |             |        |      |      |      |   |   |   |   |
|-----|-----------------------------|-----------|-------|---------|----|--------------------------------------------|-------------|--------|------|------|------|---|---|---|---|
|     |                             |           |       |         |    | K.YTTVQFTGEVLKTPVSLDMLGR.I                 | 99.70%      | 68.5   | 42.7 | 64.7 | 0    | 0 | 3 | 0 |   |
| 765 | NADP-dependent malic enzyme | gi 585453 | 64360 | 100.00% | 46 | 70.60%                                     | K.APVEQMR.K | 99.20% | 46.5 | 38.9 | 25   | 0 | 3 | 0 | 0 |
|     |                             |           |       |         |    | R.ATGEEYAEFVQEFMSAVK.Q                     | 99.70%      | 102    | 45   | 91   | 0    | 4 | 3 | 0 |   |
|     |                             |           |       |         |    | R.ATGEEYAEFVQEFMSAVKQNYGEK.I               | 99.70%      | 86.8   | 46.5 | 74.6 | 0    | 0 | 2 | 0 |   |
|     |                             |           |       |         |    | K.AYELGLASR.L                              | 99.70%      | 63.7   | 41   | 29.9 | 0    | 1 | 0 | 0 |   |
|     |                             |           |       |         |    | K.AYELGLASRLPQPADLVK.F                     | 99.70%      | 47.4   | 39.5 | 38.7 | 0    | 1 | 3 | 0 |   |
|     |                             |           |       |         |    | R.DAHFLR.G                                 | 97.30%      | 38.2   | 39   | 2.55 | 0    | 2 | 0 | 0 |   |
|     |                             |           |       |         |    | K.ERDAHFLR.G                               | 97.10%      | 35.3   | 43.3 | 0    | 0    | 1 | 0 | 0 |   |
|     |                             |           |       |         |    | K.FAESCMYNPTYR.S                           | 99.70%      | 79.1   | 42.2 | 60.7 | 0    | 6 | 2 | 0 |   |
|     |                             |           |       |         |    | K.FLFLGAGEAGTGIAELIALEMSKK.T               | 97.50%      | 38.8   | 40   | 27.3 | 0    | 0 | 1 | 0 |   |
|     |                             |           |       |         |    | K.FLTTLR.Q                                 | 99.30%      | 35.9   | 35.5 | 0    | 0    | 3 | 0 | 0 |   |
|     |                             |           |       |         |    | K.GLAFTEK.E                                | 98.20%      | 35.8   | 41   | 17.5 | 0    | 2 | 0 | 0 |   |
|     |                             |           |       |         |    | K.GLAFTEKER.D                              | 99.70%      | 61.8   | 41.7 | 33.3 | 0    | 2 | 0 | 0 |   |
|     |                             |           |       |         |    | K.GLIYPPFKDIR.K                            | 96.10%      | 35.8   | 39.1 | 0    | 0    | 1 | 0 | 0 |   |
|     |                             |           |       |         |    | K.GLIYPPFKDIR.I                            | 94.70%      | 22.6   | 37.1 | 0    | 0    | 0 | 1 | 0 |   |
|     |                             |           |       |         |    | R.GLLPPVLSQELQEK.K                         | 99.70%      | 95.5   | 36.6 | 81.2 | 0    | 5 | 2 | 0 |   |
|     |                             |           |       |         |    | R.GLLPPVLSQELQEKK.F                        | 99.70%      | 72     | 34.1 | 44.8 | 0    | 3 | 0 | 0 |   |
|     |                             |           |       |         |    | K.GLVVSSRK.E                               | 96.70%      | 31.1   | 39.9 | 11.8 | 0    | 1 | 0 | 0 |   |
|     |                             |           |       |         |    | R.ILGLDGLGCQGMGIPVGK.L                     | 99.70%      | 66.5   | 42.8 | 28.6 | 0    | 3 | 3 | 0 |   |
|     |                             |           |       |         |    | K.ILVQFEDFANHNAFELLEK.Y                    | 99.70%      | 83.5   | 44   | 4.96 | 0    | 2 | 3 | 0 |   |
|     |                             |           |       |         |    | K.ILVQFEDFANHNAFELLEKYR.T                  | 99.70%      | 71.4   | 43.4 | 11.1 | 0    | 0 | 2 | 0 |   |
|     |                             |           |       |         |    | K.IQVIVVTDGER.I                            | 99.50%      | 43     | 40.3 | 32.9 | 0    | 3 | 0 | 0 |   |
|     |                             |           |       |         |    | K.ISAHIAAGVAAK.A                           | 99.70%      | 42.9   | 37.7 | 18.6 | 0    | 0 | 3 | 0 |   |
|     |                             |           |       |         |    | K.IWLVDK.G                                 | 98.60%      | 37.7   | 41.3 | 9.39 | 0    | 2 | 0 | 0 |   |
|     |                             |           |       |         |    | R.KETLQQFK.L                               | 95.70%      | 43.9   | 41.5 | 21.4 | 0    | 1 | 0 | 0 |   |
|     |                             |           |       |         |    | K.KIQVIVVTDGER.I                           | 99.70%      | 71.7   | 38.6 | 50.4 | 0    | 2 | 0 | 0 |   |
|     |                             |           |       |         |    | R.KISAHIAAGVAAK.A                          | 99.70%      | 56.3   | 34.1 | 10.9 | 0    | 3 | 3 | 0 |   |
|     |                             |           |       |         |    | K.KIWLVDK.G                                | 98.30%      | 35.1   | 39.9 | 17.6 | 0    | 2 | 0 | 0 |   |
|     |                             |           |       |         |    | R.KIWLVDK.G                                | 97.40%      | 29.8   | 37.1 | 10.4 | 0    | 1 | 0 | 0 |   |
|     |                             |           |       |         |    | K.LLDDEFYIGLK.Q                            | 99.70%      | 87.7   | 45.4 | 57.5 | 0    | 3 | 0 | 0 |   |
|     |                             |           |       |         |    | K.LLVDHVEELLPLVYTPTVGEGCQK.Y               | 99.70%      | 78.3   | 41.8 | 66.2 | 0    | 0 | 2 | 2 |   |
|     |                             |           |       |         |    | R.LPQPADLVK.F                              | 99.70%      | 61.8   | 36.9 | 37.8 | 0    | 5 | 0 | 0 |   |
|     |                             |           |       |         |    | K.LPWAHEHEPITTLIDAVQAIKPTVLIGTSGK.G        | 99.70%      | 66.2   | 35.9 | 50.8 | 0    | 0 | 0 | 2 |   |
|     |                             |           |       |         |    | K.LSLYSALGGVCPASACLPTLDVGTNNQK.L           | 99.70%      | 52     | 44.2 | 37.2 | 0    | 0 | 2 | 0 |   |
|     |                             |           |       |         |    | R.NEKL FYK.L                               | 97.30%      | 37.6   | 38.5 | 8.72 | 0    | 1 | 0 | 0 |   |
|     |                             |           |       |         |    | R.QYQVPLQK.Y                               | 99.40%      | 51.4   | 41.8 | 22.8 | 0    | 3 | 0 | 0 |   |
|     |                             |           |       |         |    | K.RATGEEYAEFVQEFMSAVK.Q                    | 99.70%      | 71.5   | 45.3 | 55.5 | 0    | 0 | 3 | 0 |   |
|     |                             |           |       |         |    | R.RPQGLFISLK.D                             | 99.60%      | 41.7   | 37.5 | 7.84 | 0    | 3 | 0 | 0 |   |
|     |                             |           |       |         |    | R.RPQGLFISLKDK.G                           | 99.70%      | 56.9   | 37.3 | 39   | 0    | 1 | 3 | 0 |   |
|     |                             |           |       |         |    | R.RPQGLFISLKDKGR.I                         | 99.70%      | 38.6   | 35.8 | 30.4 | 0    | 0 | 2 | 2 |   |
|     |                             |           |       |         |    | K.TKAPVEQMR.K                              | 98.50%      | 37.3   | 41.3 | 20.4 | 0    | 1 | 0 | 0 |   |
|     |                             |           |       |         |    | R.TTHLVFNDDIQGTASVVLAGLIASLK.L             | 99.70%      | 62.4   | 37.5 | 13.8 | 0    | 0 | 1 | 0 |   |
|     |                             |           |       |         |    | R.VHDDMLLAASEALASQVTGEHFIK.G               | 99.70%      | 87.1   | 44.6 | 78.2 | 0    | 3 | 4 | 5 |   |
|     |                             |           |       |         |    | K.YGSIFR.R                                 | 99.30%      | 38.5   | 37.4 | 0    | 0    | 3 | 0 | 0 |   |
|     |                             |           |       |         |    | K.YMAMMDLQER.N                             | 99.40%      | 43.2   | 41.6 | 1.11 | 0    | 4 | 0 | 0 |   |
|     |                             |           |       |         |    | K.YMAMMDLQERNEK.L                          | 95.70%      | 29.7   | 43.4 | 18   | 0    | 1 | 1 | 0 |   |
|     |                             |           |       |         |    | K.YMAMMDLQERNEKLFYK.L                      | 95.40%      | 31.6   | 45.2 | 22.4 | 0    | 0 | 0 | 1 |   |
| 767 | NADP-dependent malic enzyme | gi 585453 | 64360 | 100.00% | 49 | 76.90%                                     | K.APVEQMR.K | 99.60% | 44.5 | 38.9 | 22.9 | 0 | 3 | 0 | 0 |
|     |                             |           |       |         |    | R.ATGEEYAEFVQEFMSAVK.Q                     | 99.70%      | 77.4   | 45   | 60.5 | 0    | 3 | 4 | 0 |   |
|     |                             |           |       |         |    | R.ATGEEYAEFVQEFMSAVKQNYGEK.I               | 99.70%      | 73.8   | 46.5 | 63.1 | 0    | 0 | 2 | 0 |   |
|     |                             |           |       |         |    | K.AYELGLASR.L                              | 99.70%      | 62.1   | 41.1 | 29   | 0    | 1 | 0 | 0 |   |
|     |                             |           |       |         |    | K.AYELGLASRLPQPADLVK.F                     | 99.70%      | 52.5   | 39.6 | 41.9 | 0    | 0 | 3 | 0 |   |
|     |                             |           |       |         |    | K.ERDAHFLR.G                               | 97.50%      | 36.5   | 43.3 | 7.39 | 0    | 2 | 0 | 0 |   |
|     |                             |           |       |         |    | K.ETLQQFK.L                                | 99.30%      | 42.4   | 41.2 | 14.6 | 0    | 3 | 0 | 0 |   |
|     |                             |           |       |         |    | K.ETLQQFKLPWAHEHEPITTLIDAVQAIKPTVLIGTSGK.L | 99.30%      | 35.8   | 37.5 | 20.4 | 0    | 0 | 0 | 1 |   |

|     |                             |           |       |         |    |        |                                           |        |      |      |      |   |   |   |   |
|-----|-----------------------------|-----------|-------|---------|----|--------|-------------------------------------------|--------|------|------|------|---|---|---|---|
|     |                             |           |       |         |    |        | K.FAESCMYNPTYR.S                          | 99.70% | 83.4 | 42.1 | 61.4 | 0 | 6 | 1 | 0 |
|     |                             |           |       |         |    |        | K.FLFLGAGEAGTGIAELIALEMSK.K               | 99.70% | 87.6 | 42.3 | 74.1 | 0 | 0 | 3 | 0 |
|     |                             |           |       |         |    |        | K.FLFLGAGEAGTGIAELIALEMSK.K.T             | 99.70% | 48.5 | 40   | 29.1 | 0 | 0 | 3 | 0 |
|     |                             |           |       |         |    |        | K.FLTTLR.Q                                | 97.80% | 36.7 | 36   | 0    | 0 | 3 | 0 | 0 |
|     |                             |           |       |         |    |        | K.GLAFTEKER.D                             | 99.50% | 53.8 | 41.6 | 26.1 | 0 | 1 | 0 | 0 |
|     |                             |           |       |         |    |        | K.GLIYPPFKDIR.K                           | 98.10% | 40.8 | 39.3 | 0    | 0 | 1 | 0 | 0 |
|     |                             |           |       |         |    |        | R.GLLPPVLSQELQEK.K                        | 99.70% | 81.7 | 36.7 | 67.2 | 0 | 4 | 3 | 0 |
|     |                             |           |       |         |    |        | R.GLLPPVLSQELQEK.K.F                      | 99.70% | 88.4 | 34.1 | 54.5 | 0 | 3 | 0 | 0 |
|     |                             |           |       |         |    |        | K.GLVSSRK.E                               | 98.80% | 38   | 39.9 | 20.4 | 0 | 3 | 0 | 0 |
|     |                             |           |       |         |    |        | R.ILGLDGLGCGMGIPVKG.L                     | 99.70% | 67.2 | 42.9 | 37.3 | 0 | 3 | 3 | 0 |
|     |                             |           |       |         |    |        | K.ILVQFEDFANHNAFELLEK.Y                   | 99.70% | 68.5 | 44.1 | 2.78 | 0 | 1 | 3 | 0 |
|     |                             |           |       |         |    |        | K.ILVQFEDFANHNAFELLEKYR.T                 | 99.70% | 56.1 | 43.4 | 9.08 | 0 | 0 | 3 | 1 |
|     |                             |           |       |         |    |        | K.IQVIVVTDGER.I                           | 98.10% | 41.9 | 40.4 | 31.8 | 0 | 2 | 0 | 0 |
|     |                             |           |       |         |    |        | K.IQVIVVTDGERILGLDGLGCGMGIPVKG.L          | 99.50% | 34.5 | 39.8 | 21.1 | 0 | 0 | 1 | 0 |
|     |                             |           |       |         |    |        | K.ISAHIAAGVAAK.A                          | 99.70% | 43.5 | 37.7 | 19.3 | 0 | 0 | 3 | 0 |
|     |                             |           |       |         |    |        | K.IWLVDSK.G                               | 97.00% | 39.8 | 41.3 | 6.47 | 0 | 2 | 0 | 0 |
|     |                             |           |       |         |    |        | K.KIQVIVVTDGER.I                          | 99.60% | 58.8 | 38.8 | 34.6 | 0 | 1 | 1 | 0 |
|     |                             |           |       |         |    |        | R.KISAHIAAGVAAK.A                         | 99.70% | 83.6 | 34.1 | 37.8 | 0 | 3 | 3 | 0 |
|     |                             |           |       |         |    |        | K.KIWLVDK.G                               | 99.50% | 51.5 | 40.2 | 27.2 | 0 | 2 | 0 | 0 |
|     |                             |           |       |         |    |        | R.KIWLVDK.G                               | 98.60% | 34   | 37.1 | 11.2 | 0 | 3 | 0 | 0 |
|     |                             |           |       |         |    |        | K.LLDDEFYGLK.Q                            | 99.70% | 87.6 | 45.4 | 57.6 | 0 | 3 | 0 | 0 |
|     |                             |           |       |         |    |        | K.LLGGTLADHKFLFLGAGEAGTGIAELIALEMSK.K     | 99.70% | 41.5 | 39   | 5.2  | 0 | 0 | 0 | 1 |
|     |                             |           |       |         |    |        | K.LLGGTLADHKFLFLGAGEAGTGIAELIALEMSK.K.T   | 99.70% | 57.5 | 38.7 | 47   | 0 | 0 | 0 | 3 |
|     |                             |           |       |         |    |        | K.LLVDHVEELLPLVYPTVGEQK.Y                 | 99.70% | 58.8 | 41.9 | 46.1 | 0 | 0 | 0 | 1 |
|     |                             |           |       |         |    |        | R.LPQPADLVK.F                             | 99.70% | 65.3 | 38.2 | 41   | 0 | 5 | 0 | 0 |
|     |                             |           |       |         |    |        | K.LPWAHEHEPITLIDAVQAIKPTVLIGTSGK.G        | 99.70% | 66.2 | 35.8 | 59   | 0 | 0 | 0 | 2 |
|     |                             |           |       |         |    |        | K.LSLYSALGGVCPACLITLDVGTNNQK.L            | 99.70% | 51.9 | 44.3 | 46.6 | 0 | 0 | 2 | 0 |
|     |                             |           |       |         |    |        | R.NEKLKY.L                                | 99.00% | 37.9 | 38.5 | 6.86 | 0 | 3 | 0 | 0 |
|     |                             |           |       |         |    |        | R.QYQVPLQK.Y                              | 98.30% | 37.3 | 41.8 | 12.4 | 0 | 3 | 0 | 0 |
|     |                             |           |       |         |    |        | K.RATGEEYAEFVQEFMSAVK.Q                   | 99.70% | 68.4 | 45.2 | 48.3 | 0 | 0 | 3 | 0 |
|     |                             |           |       |         |    |        | R.RPQGLFISLK.D                            | 99.70% | 39.7 | 37.6 | 29.5 | 0 | 3 | 1 | 0 |
|     |                             |           |       |         |    |        | R.RPQGLFISLKDK.G                          | 99.70% | 55.6 | 37.7 | 38.6 | 0 | 1 | 3 | 0 |
|     |                             |           |       |         |    |        | R.RPQGLFISLKDKGR.I                        | 99.70% | 65.9 | 36.4 | 43.3 | 0 | 0 | 3 | 3 |
|     |                             |           |       |         |    |        | R.TFVPGQANNAYIFPGFGLIMCGAIR.V             | 99.70% | 71.5 | 44.1 | 57   | 0 | 0 | 6 | 0 |
|     |                             |           |       |         |    |        | K.TKAPVEQMR.K                             | 99.00% | 40.5 | 41.3 | 22   | 0 | 1 | 0 | 0 |
|     |                             |           |       |         |    |        | R.TTHLVFNDDIQGTASVVLGLIASLK.L             | 99.70% | 111  | 37.8 | 0    | 0 | 1 | 3 | 2 |
|     |                             |           |       |         |    |        | R.VHDDMLLAASEALASQVTGEHF.K.G              | 99.70% | 96   | 44.5 | 82.7 | 0 | 2 | 3 | 3 |
|     |                             |           |       |         |    |        | K.YGSIFR.R                                | 98.60% | 34.2 | 37.5 | 0    | 0 | 3 | 0 | 0 |
|     |                             |           |       |         |    |        | K.YMAMMDLQER.N                            | 99.60% | 46   | 41.2 | 30.2 | 0 | 4 | 0 | 0 |
|     |                             |           |       |         |    |        | K.YMAMMDLQERNEK.L                         | 99.20% | 36.3 | 43.5 | 24   | 0 | 1 | 1 | 0 |
|     |                             |           |       |         |    |        | K.YRTTHLVFNDDIQGTASVVLGLIASLK.L           | 99.70% | 42.2 | 40.3 | 7.13 | 0 | 0 | 0 | 1 |
| 774 | NADP-dependent malic enzyme | gi 585453 | 64360 | 100.00% | 48 | 75.90% | K.APVEQMR.K                               | 99.30% | 43.8 | 38.9 | 21.6 | 0 | 3 | 0 | 0 |
|     |                             |           |       |         |    |        | R.ATGEEYAEFVQEFMSAVK.Q                    | 99.70% | 107  | 44.9 | 97.5 | 0 | 3 | 3 | 0 |
|     |                             |           |       |         |    |        | R.ATGEEYAEFVQEFMSAVKQNYGEK.I              | 99.70% | 71.9 | 46.5 | 61.8 | 0 | 0 | 3 | 0 |
|     |                             |           |       |         |    |        | K.AYELGLASR.L                             | 99.70% | 70.4 | 40.5 | 36.2 | 0 | 2 | 0 | 0 |
|     |                             |           |       |         |    |        | K.AYELGLASRLPQPADLVK.F                    | 99.70% | 44.7 | 40.2 | 31.9 | 0 | 1 | 3 | 0 |
|     |                             |           |       |         |    |        | R.DAHFLR.G                                | 95.40% | 31   | 39.3 | 0.07 | 0 | 1 | 0 | 0 |
|     |                             |           |       |         |    |        | K.ERDAHFLR.G                              | 96.20% | 35.9 | 43.3 | 7.07 | 0 | 2 | 0 | 0 |
|     |                             |           |       |         |    |        | K.ETLQQFK.L                               | 99.30% | 42.8 | 41.2 | 14.6 | 0 | 1 | 0 | 0 |
|     |                             |           |       |         |    |        | K.ETLQQFKLPWAHEHEPITLIDAVQAIKPTVLIGTSGK.G | 99.00% | 34.8 | 37.7 | 24.6 | 0 | 0 | 0 | 0 |
|     |                             |           |       |         |    |        | K.FAESCMYNPTYR.S                          | 99.70% | 72.1 | 42   | 54.1 | 0 | 6 | 1 | 0 |
|     |                             |           |       |         |    |        | K.FLFLGAGEAGTGIAELIALEMSK.K.T             | 98.70% | 36.2 | 41.2 | 17.2 | 0 | 0 | 1 | 0 |
|     |                             |           |       |         |    |        | K.GLAFTEKER.D                             | 99.70% | 57.5 | 41.6 | 37   | 0 | 1 | 0 | 0 |
|     |                             |           |       |         |    |        | K.GLAFTEKERDAHFLR.G                       | 98.90% | 35.3 | 42.6 | 29.4 | 0 | 0 | 2 | 0 |
|     |                             |           |       |         |    |        | K.GLIYPPFKDIR.K                           | 96.60% | 37.1 | 39.4 | 0    | 0 | 2 | 0 | 0 |
|     |                             |           |       |         |    |        | R.GLLPPVLSQELQEK.K                        | 99.70% | 88.8 | 37.1 | 60.2 | 0 | 5 | 3 | 0 |

|     |                             |           |       |         |    |                                      |                                           |        |      |      |      |   |   |   |   |
|-----|-----------------------------|-----------|-------|---------|----|--------------------------------------|-------------------------------------------|--------|------|------|------|---|---|---|---|
|     |                             |           |       |         |    | R.GLLPPVLSQELQEKK.F                  | 99.70%                                    | 81.6   | 34.6 | 52.1 | 0    | 3 | 0 | 0 |   |
|     |                             |           |       |         |    | K.GLVVSSRK.E                         | 95.80%                                    | 39     | 39.9 | 21.3 | 0    | 1 | 0 | 0 |   |
|     |                             |           |       |         |    | R.ILGLDGLGCQGMGIPVGK.L               | 99.70%                                    | 68.8   | 43   | 27   | 0    | 3 | 3 | 0 |   |
|     |                             |           |       |         |    | K.ILVQFEDFANHNAFELLEK.Y              | 99.70%                                    | 64.3   | 43.8 | 2.15 | 0    | 2 | 3 | 0 |   |
|     |                             |           |       |         |    | K.ILVQFEDFANHNAFELLEKYR.T            | 99.70%                                    | 62.6   | 43.7 | 10.9 | 0    | 0 | 3 | 0 |   |
|     |                             |           |       |         |    | K.IQVIVVDGER.I                       | 99.70%                                    | 62.8   | 40.9 | 43.8 | 0    | 1 | 0 | 0 |   |
|     |                             |           |       |         |    | K.ISAHIAAGVAAK.A                     | 99.70%                                    | 74.2   | 37.7 | 32.3 | 0    | 3 | 3 | 0 |   |
|     |                             |           |       |         |    | K.IWLVDK.G                           | 97.50%                                    | 41.7   | 42.1 | 0    | 0    | 1 | 0 | 0 |   |
|     |                             |           |       |         |    | R.KETLQQFK.L                         | 98.00%                                    | 40.4   | 41.5 | 15.2 | 0    | 1 | 0 | 0 |   |
|     |                             |           |       |         |    | K.KIQVIVVDGER.I                      | 99.70%                                    | 59.2   | 39.4 | 31.5 | 0    | 3 | 1 | 0 |   |
|     |                             |           |       |         |    | R.KISAHIAAGVAAK.A                    | 99.70%                                    | 85.3   | 34.1 | 36.3 | 0    | 3 | 3 | 0 |   |
|     |                             |           |       |         |    | K.KIWLVDK.G                          | 98.30%                                    | 42.8   | 40.1 | 22.6 | 0    | 2 | 0 | 0 |   |
|     |                             |           |       |         |    | R.KKIWLVDK.G                         | 99.00%                                    | 37.2   | 37.1 | 14.2 | 0    | 2 | 0 | 0 |   |
|     |                             |           |       |         |    | K.LLDDEFYGLK.Q                       | 99.70%                                    | 87.7   | 45.5 | 57.6 | 0    | 3 | 0 | 0 |   |
|     |                             |           |       |         |    | K.LLGGTLADHKFLFGAGEAGTGIAELIALEMSK.K | 99.70%                                    | 46     | 39.4 | 15.6 | 0    | 0 | 0 | 1 |   |
|     |                             |           |       |         |    | K.LLVDHVEELLPLVYPTVGECCQK.Y          | 98.00%                                    | 33     | 42.2 | 21.8 | 0    | 0 | 0 | 1 |   |
|     |                             |           |       |         |    | R.LPQPADLVK.F                        | 99.70%                                    | 64     | 37.3 | 41.2 | 0    | 6 | 0 | 0 |   |
|     |                             |           |       |         |    | K.LPWAHEHEPITLIDAVQAIKPTVLIGTSGK.G   | 99.70%                                    | 69.3   | 37.1 | 61.8 | 0    | 0 | 0 | 2 |   |
|     |                             |           |       |         |    | K.LSLYSALGVCPAACLPTLDVGTNNQK.L       | 99.70%                                    | 54.2   | 44.5 | 45.2 | 0    | 0 | 3 | 0 |   |
|     |                             |           |       |         |    | R.NEKLKYK.L                          | 97.70%                                    | 36.5   | 38.5 | 5.39 | 0    | 1 | 0 | 0 |   |
|     |                             |           |       |         |    | R.QYQVPLQK.Y                         | 98.90%                                    | 41     | 41.7 | 5.32 | 0    | 3 | 0 | 0 |   |
|     |                             |           |       |         |    | K.RATGEEYAEFVQEFMSAVK.Q              | 99.70%                                    | 63.8   | 45.2 | 45.4 | 0    | 0 | 3 | 0 |   |
|     |                             |           |       |         |    | K.RATGEEYAEFVQEFMSAVKQNYGEK.I        | 97.30%                                    | 35.7   | 46.2 | 17.5 | 0    | 0 | 0 | 1 |   |
|     |                             |           |       |         |    | R.RPQGLFISLK.D                       | 98.70%                                    | 41.3   | 37.5 | 12.3 | 0    | 3 | 0 | 0 |   |
|     |                             |           |       |         |    | R.RPQGLFISLKD.K.G                    | 99.70%                                    | 43.5   | 38.5 | 25.9 | 0    | 2 | 3 | 0 |   |
|     |                             |           |       |         |    | R.RPQGLFISLKD.KGR.I                  | 99.50%                                    | 54.2   | 36.8 | 35.4 | 0    | 1 | 1 | 3 |   |
|     |                             |           |       |         |    | R.TFVPGQANNAYIFPGFGLGIMCGAIR.V       | 99.70%                                    | 64.8   | 44.3 | 52.5 | 0    | 0 | 3 | 0 |   |
|     |                             |           |       |         |    | K.KTAPVEQMR.K                        | 96.10%                                    | 37.1   | 42   | 26.2 | 0    | 1 | 0 | 0 |   |
|     |                             |           |       |         |    | R.TTHLVFNDDIQGTASVVLAGLIASLK.L       | 99.70%                                    | 46     | 38.6 | 9.17 | 0    | 0 | 3 | 0 |   |
|     |                             |           |       |         |    | R.VHDDMLLAASEALASQVTGEHFIK.G         | 99.70%                                    | 90.5   | 44.5 | 82.9 | 0    | 2 | 5 | 4 |   |
|     |                             |           |       |         |    | K.YGSIFR.R                           | 98.00%                                    | 38.5   | 37.7 | 0    | 0    | 3 | 0 | 0 |   |
|     |                             |           |       |         |    | K.YMAMMDLQER.N                       | 99.30%                                    | 43.4   | 41.2 | 31.1 | 0    | 5 | 0 | 0 |   |
|     |                             |           |       |         |    | K.YMAMMDLQERNEK.L                    | 99.20%                                    | 44.7   | 43.5 | 33.5 | 0    | 2 | 0 | 0 |   |
| 775 | NADP-dependent malic enzyme | gi 585453 | 64360 | 100.00% | 54 | 76.90%                               | K.APVEQMR.K                               | 99.60% | 47.1 | 38.9 | 25.6 | 0 | 3 | 0 | 0 |
|     |                             |           |       |         |    |                                      | R.ATGEEYAEFVQEFMSAVK.Q                    | 99.70% | 108  | 45   | 98   | 0 | 3 | 5 | 0 |
|     |                             |           |       |         |    |                                      | R.ATGEEYAEFVQEFMSAVKQNYGEK.I              | 99.70% | 82.7 | 46.5 | 75.8 | 0 | 0 | 4 | 0 |
|     |                             |           |       |         |    |                                      | K.AYELGLASR.L                             | 99.70% | 61.7 | 41.1 | 30.9 | 0 | 3 | 0 | 0 |
|     |                             |           |       |         |    |                                      | K.AYELGLASRLPQPADLVK.F                    | 99.70% | 50   | 39.4 | 40.6 | 0 | 0 | 3 | 0 |
|     |                             |           |       |         |    |                                      | R.DAHFLR.G                                | 97.00% | 33.6 | 39.3 | 0.07 | 0 | 1 | 0 | 0 |
|     |                             |           |       |         |    |                                      | K.ERDAHFLR.G                              | 96.40% | 36.4 | 43.4 | 14   | 0 | 1 | 0 | 0 |
|     |                             |           |       |         |    |                                      | K.ETLQQFK.L                               | 99.10% | 43.5 | 41.2 | 9.38 | 0 | 2 | 0 | 0 |
|     |                             |           |       |         |    |                                      | K.ETLQQFKLPWAHEHEPITLIDAVQAIKPTVLIGTSGK.G | 99.70% | 40.1 | 37.3 | 33.6 | 0 | 0 | 0 | 0 |
|     |                             |           |       |         |    |                                      | K.FAESCMIYNTYR.S                          | 99.70% | 81   | 42.2 | 63   | 0 | 6 | 1 | 0 |
|     |                             |           |       |         |    |                                      | K.FLFLGAGEAGTGIAELIALEMSK.K               | 99.00% | 40.4 | 42.1 | 27.9 | 0 | 0 | 1 | 0 |
|     |                             |           |       |         |    |                                      | K.FLFLGAGEAGTGIAELIALEMSK.T               | 99.60% | 47.3 | 40   | 24.9 | 0 | 0 | 2 | 0 |
|     |                             |           |       |         |    |                                      | K.FLTTLR.Q                                | 98.80% | 36.2 | 36   | 0    | 0 | 1 | 0 | 0 |
|     |                             |           |       |         |    |                                      | K.FLTTLRQYQVPLQK.Y                        | 96.20% | 25.6 | 37.6 | 17.2 | 0 | 0 | 1 | 0 |
|     |                             |           |       |         |    |                                      | K.GLAFTEKER.D                             | 99.70% | 61.3 | 41.7 | 41   | 0 | 1 | 0 | 0 |
|     |                             |           |       |         |    |                                      | K.GLAFTEKERDAHFLR.G                       | 98.20% | 33.2 | 42.5 | 24.1 | 0 | 0 | 1 | 0 |
|     |                             |           |       |         |    |                                      | K.GLIYPPFK.D                              | 98.10% | 36.5 | 39.1 | 0    | 0 | 1 | 0 | 0 |
|     |                             |           |       |         |    |                                      | K.GLIYPPFKDIR.K                           | 99.20% | 42.6 | 39.3 | 0    | 0 | 3 | 0 | 0 |
|     |                             |           |       |         |    |                                      | R.GLLPPVLSQELQEKK.K                       | 99.70% | 62.1 | 36.7 | 46.7 | 0 | 5 | 3 | 0 |
|     |                             |           |       |         |    |                                      | R.GLLPPVLSQELQEKK.F                       | 99.70% | 77.2 | 33.7 | 67.1 | 0 | 3 | 0 | 0 |
|     |                             |           |       |         |    |                                      | K.GLVVSSRK.E                              | 96.60% | 38.2 | 39.9 | 16.6 | 0 | 1 | 0 | 0 |
|     |                             |           |       |         |    |                                      | R.ILGLDGLGCQGMGIPVGK.L                    | 99.70% | 76.5 | 42.8 | 54.3 | 0 | 3 | 3 | 0 |
|     |                             |           |       |         |    |                                      | K.ILVQFEDFANHNAFELLEK.Y                   | 99.70% | 82.8 | 44   | 2.87 | 0 | 1 | 1 | 0 |

|       |                                   |              |        |         |    |                                             |                  |        |      |      |      |    |   |   |   |
|-------|-----------------------------------|--------------|--------|---------|----|---------------------------------------------|------------------|--------|------|------|------|----|---|---|---|
|       |                                   |              |        |         |    | K.ILVQFEDFANHNAFELLEKYR.T                   | 99.70%           | 61.7   | 43.3 | 14.9 | 0    | 0  | 3 | 0 |   |
|       |                                   |              |        |         |    | K.IQVIVVTDGER.I                             | 99.70%           | 75.2   | 40.4 | 49.6 | 0    | 2  | 0 | 0 |   |
|       |                                   |              |        |         |    | K.IQVIVVTDGERILGLDLCQGMGIPVGK.L             | 99.70%           | 52.9   | 39.8 | 34.1 | 0    | 0  | 1 | 0 |   |
|       |                                   |              |        |         |    | K.ISAHIAAGVAAK.A                            | 99.70%           | 45.5   | 37.7 | 17.8 | 0    | 0  | 3 | 0 |   |
|       |                                   |              |        |         |    | K.IWLVDK.G                                  | 96.60%           | 39.7   | 41.3 | 11.9 | 0    | 2  | 0 | 0 |   |
|       |                                   |              |        |         |    | R.KETLQQFK.L                                | 98.80%           | 42.1   | 41.5 | 24.5 | 0    | 1  | 0 | 0 |   |
|       |                                   |              |        |         |    | R.KETLQQFKLPWAHEHEPITTLIDAVQAIKPTVLIGTSGK.G | 98.40%           | 30.8   | 38.5 | 21   | 0    | 0  | 0 | 0 |   |
|       |                                   |              |        |         |    | K.KIQVIVVTDGER.I                            | 99.70%           | 71.9   | 38.6 | 50.3 | 0    | 2  | 2 | 0 |   |
|       |                                   |              |        |         |    | R.KISAHIAAGVAAK.A                           | 99.70%           | 85.2   | 34.1 | 33.9 | 0    | 3  | 3 | 0 |   |
|       |                                   |              |        |         |    | K.KIWLVDK.G                                 | 99.70%           | 50.2   | 39.9 | 28.7 | 0    | 3  | 0 | 0 |   |
|       |                                   |              |        |         |    | R.KKIWLVDK.G                                | 97.00%           | 36.5   | 37.1 | 10.6 | 0    | 1  | 0 | 0 |   |
|       |                                   |              |        |         |    | K.LLDDEFYIGLK.Q                             | 99.70%           | 87.7   | 45.4 | 57.6 | 0    | 3  | 0 | 0 |   |
|       |                                   |              |        |         |    | K.LLGGTLADHKFLFLGAGEAGTGIAELIALEMSK.K       | 99.70%           | 50.4   | 38.8 | 4.87 | 0    | 0  | 0 | 1 |   |
|       |                                   |              |        |         |    | K.LLGGTLADHKFLFLGAGEAGTGIAELIALEMSK.T       | 99.70%           | 66.8   | 38.5 | 60   | 0    | 0  | 0 | 4 |   |
|       |                                   |              |        |         |    | K.LLVDHVEELLPLVYTPVTGEGCQK.Y                | 99.70%           | 50.2   | 41.8 | 39   | 0    | 0  | 0 | 1 |   |
|       |                                   |              |        |         |    | R.LPQPADLVK.F                               | 99.70%           | 57.3   | 38.2 | 35   | 0    | 4  | 0 | 0 |   |
|       |                                   |              |        |         |    | K.LPWAHEHEPITTLIDAVQAIKPTVLIGTSGK.G         | 99.70%           | 78.3   | 35.8 | 75.1 | 0    | 0  | 0 | 2 |   |
|       |                                   |              |        |         |    | K.LSLYSALGGVCPACSACLPITLDVGTNNQK.L          | 99.70%           | 66.6   | 44.1 | 59.2 | 0    | 0  | 3 | 0 |   |
|       |                                   |              |        |         |    | R.NEKLQK.L                                  | 98.30%           | 36.3   | 38.5 | 5.51 | 0    | 1  | 0 | 0 |   |
|       |                                   |              |        |         |    | R.QYQVPLQK.Y                                | 98.90%           | 42.7   | 41.8 | 19.2 | 0    | 3  | 0 | 0 |   |
|       |                                   |              |        |         |    | K.RATGEEYAEFVQEFMSAVK.Q                     | 99.70%           | 68.7   | 45.3 | 48.6 | 0    | 0  | 3 | 0 |   |
|       |                                   |              |        |         |    | R.RPQGLFISLK.D                              | 98.50%           | 42     | 37.5 | 12.7 | 0    | 3  | 0 | 0 |   |
|       |                                   |              |        |         |    | R.RPQGLFISLKDK.G                            | 99.70%           | 47.7   | 37.7 | 31   | 0    | 3  | 3 | 0 |   |
|       |                                   |              |        |         |    | R.RPQGLFISLKDKGR.I                          | 99.70%           | 63.8   | 35.9 | 47.8 | 0    | 0  | 3 | 3 |   |
|       |                                   |              |        |         |    | R.TFVPGQANNAYIFPGFGLIMCGAIR.V               | 99.70%           | 67.7   | 43.8 | 58.8 | 0    | 0  | 2 | 0 |   |
|       |                                   |              |        |         |    | K.TKAPVEQMR.K                               | 97.00%           | 35.3   | 41.3 | 17.4 | 0    | 1  | 0 | 0 |   |
|       |                                   |              |        |         |    | R.TTHLVFNDDIQGTASVVLGLIASLK.L               | 99.70%           | 57.5   | 37.7 | 13.5 | 0    | 1  | 3 | 2 |   |
|       |                                   |              |        |         |    | R.VHDDMLLAASEALASQVTGEHFIK.G                | 99.70%           | 76.5   | 44.5 | 62.2 | 0    | 2  | 3 | 5 |   |
|       |                                   |              |        |         |    | K.YGSIFR.R                                  | 98.20%           | 40.5   | 37.4 | 0    | 0    | 3  | 0 | 0 |   |
|       |                                   |              |        |         |    | K.YMAMMDLQER.N                              | 99.20%           | 45.5   | 41.6 | 10.2 | 0    | 7  | 0 | 0 |   |
|       |                                   |              |        |         |    | K.YMAMMDLQERNEK.L                           | 96.80%           | 37.1   | 43.4 | 25.3 | 0    | 1  | 0 | 0 |   |
| 1062  | Alpha-1,4-glucan-protein synthase | gi 356495127 | 41713  | 100.00% | 16 | 41.80%                                      | K.ASCISFK.D      | 99.10% | 46.8 | 41.7 | 15.2 | 0  | 3 | 0 | 0 |
|       |                                   |              |        |         |    | K.ASCISFKDSACR.C                            | 99.50%           | 52.8   | 43   | 35   | 0    | 3  | 1 | 0 |   |
|       |                                   |              |        |         |    | K.ASNPFVNLK.K                               | 99.20%           | 59.5   | 41.5 | 35.7 | 0    | 3  | 0 | 0 |   |
|       |                                   |              |        |         |    | R.CFGYMVSK.K                                | 97.60%           | 37.9   | 40.9 | 18.7 | 0    | 2  | 0 | 0 |   |
|       |                                   |              |        |         |    | R.CFGYMVSKK.K                               | 95.70%           | 34.2   | 41.7 | 22.8 | 0    | 1  | 0 | 0 |   |
|       |                                   |              |        |         |    | K.ECTSVQK.C                                 | 99.00%           | 43.5   | 39.7 | 14.1 | 0    | 12 | 0 | 0 |   |
|       |                                   |              |        |         |    | R.EGAPTAVSHGLWLNIPDYDAPTQLVKPLER.N          | 99.70%           | 116    | 41.8 | 33.2 | 0    | 0  | 3 | 3 |   |
|       |                                   |              |        |         |    | K.GTLFPMCGMNLAFDR.Q                         | 99.70%           | 87     | 44   | 25.6 | 0    | 6  | 3 | 0 |   |
|       |                                   |              |        |         |    | R.GYPFSLREGAPTAVSHGLWLNIPDYDAPTQLVKPLER.N   | 99.70%           | 58.5   | 40.9 | 4.09 | 0    | 0  | 0 | 2 |   |
|       |                                   |              |        |         |    | K.KYIYTIDDDCFVAK.D                          | 97.60%           | 35.3   | 44.1 | 21.3 | 0    | 0  | 2 | 0 |   |
|       |                                   |              |        |         |    | K.KYIYTIDDDCFVAK.D                          | 99.60%           | 73.4   | 44   | 56.3 | 0    | 1  | 0 | 0 |   |
|       |                                   |              |        |         |    | K.NLLCPSTPFFNTLYDPYR.E                      | 99.70%           | 85     | 45.4 | 69.9 | 0    | 3  | 0 | 0 |   |
|       |                                   |              |        |         |    | K.VICDHLGLGVK.T                             | 99.70%           | 76.6   | 41.8 | 56.6 | 0    | 3  | 3 | 0 |   |
|       |                                   |              |        |         |    | R.YDDMWAGWCVK.V                             | 99.70%           | 60.9   | 41.3 | 39.8 | 0    | 6  | 0 | 0 |   |
|       |                                   |              |        |         |    | K.YIYTIDDDCFVAK.D                           | 99.70%           | 78.3   | 44.2 | 58   | 0    | 3  | 0 | 0 |   |
|       |                                   |              |        |         |    | R.YVDAVLTIPK.G                              | 99.70%           | 65.5   | 39.5 | 44.2 | 0    | 3  | 0 | 0 |   |
| 1065  | Beta-D-galactosidase              | gi 61162194  | 100047 | 100.00% | 3  | 3.65%                                       | K.DLHAAIK.L      | 96.40% | 31   | 38.2 | 0    | 0  | 1 | 0 | 0 |
|       |                                   |              |        |         |    | K.LGPKQEAHVYR.M                             | 99.70%           | 44.6   | 41.5 | 34.4 | 0    | 2  | 3 | 0 |   |
|       |                                   |              |        |         |    | R.LPHRPVEDLAFAVAR.F                         | 99.70%           | 47.2   | 39.7 | 37.9 | 0    | 0  | 3 | 0 |   |
| 1071a | 2-Phospho-D-glycerate hydrolase   | gi 533474    | 48340  | 100.00% | 12 | 34.50%                                      | K.AIDENSCNALLK.V | 99.70% | 74.4 | 43   | 48.2 | 0  | 3 | 0 | 0 |
|       |                                   |              |        |         |    | R.IEEELGDKAVYAGANFR.R                       | 99.70%           | 48     | 44.2 | 27.6 | 0    | 0  | 2 | 0 |   |
|       |                                   |              |        |         |    | R.ISGEALKDLYK.S                             | 99.70%           | 71.6   | 40.7 | 34   | 0    | 3  | 3 | 0 |   |
|       |                                   |              |        |         |    | K.KAGWGVMAHR.S                              | 99.70%           | 50.1   | 41.4 | 25   | 0    | 1  | 3 | 0 |   |

|       |                                   |              |       |         |    |                                    |                                           |        |      |      |      |   |   |    |   |
|-------|-----------------------------------|--------------|-------|---------|----|------------------------------------|-------------------------------------------|--------|------|------|------|---|---|----|---|
|       |                                   |              |       |         |    | K.KAIDENSCNALLK.V                  | 99.70%                                    | 103    | 42.4 | 78   | 0    | 1 | 2 | 0  |   |
|       |                                   |              |       |         |    | K.KIPLYQHIAEIAGNK.N                | 99.70%                                    | 42.9   | 37.3 | 24.5 | 0    | 0 | 1 | 0  |   |
|       |                                   |              |       |         |    | K.MGSEVYHNLK.S                     | 99.70%                                    | 59.4   | 41.7 | 40.8 | 0    | 3 | 0 | 0  |   |
|       |                                   |              |       |         |    | K.SYDLNFKEENNDGSQR.I               | 99.70%                                    | 48     | 44.5 | 34.3 | 0    | 0 | 2 | 0  |   |
|       |                                   |              |       |         |    | K.VNQIGSVTESIEAVK.M                | 99.70%                                    | 91.9   | 41.6 | 72.2 | 0    | 2 | 0 | 0  |   |
|       |                                   |              |       |         |    | K.VQIVGDDLLVTNPK.R                 | 99.70%                                    | 95     | 38.7 | 63.8 | 0    | 3 | 0 | 0  |   |
|       |                                   |              |       |         |    | K.VQIVGDDLLVTNPKR.V                | 98.70%                                    | 30.5   | 37.4 | 9.52 | 0    | 0 | 1 | 0  |   |
|       |                                   |              |       |         |    | K.YGQDATNVGDEGGFAPNIQENKEGLELLK.T  | 99.70%                                    | 87.7   | 45.5 | 0    | 0    | 0 | 2 | 0  |   |
| 1071b | Alpha-1,4-glucan-protein synthase | gi 356495127 | 41712 | 100.00% | 9  | 27.40%                             | K.ASCISFK.D                               | 98.90% | 42   | 41.7 | 13.7 | 0 | 3 | 0  | 0 |
|       |                                   |              |       |         |    | K.ASCISFKDSACR.C                   | 99.70%                                    | 49.2   | 43   | 27.7 | 0    | 1 | 3 | 0  |   |
|       |                                   |              |       |         |    | K.ASNPFVNLK.K                      | 98.90%                                    | 41.5   | 41.7 | 18.2 | 0    | 1 | 0 | 0  |   |
|       |                                   |              |       |         |    | R.CFGYMVSK.K                       | 98.60%                                    | 39.1   | 40.9 | 18.3 | 0    | 3 | 0 | 0  |   |
|       |                                   |              |       |         |    | R.EGAPTAVSHGLWLNIPDYDAPTQLVKPLER.N | 99.70%                                    | 114    | 41.7 | 32.1 | 0    | 0 | 3 | 3  |   |
|       |                                   |              |       |         |    | R.GYPFSLR.E                        | 94.90%                                    | 31.2   | 41.5 | 11.7 | 0    | 1 | 0 | 0  |   |
|       |                                   |              |       |         |    | K.VICDHLGLGVK.T                    | 99.70%                                    | 76.6   | 41.8 | 57   | 0    | 3 | 3 | 0  |   |
|       |                                   |              |       |         |    | R.YDDMWAGWCVK.V                    | 99.70%                                    | 60.4   | 40.9 | 41.5 | 0    | 3 | 0 | 0  |   |
|       |                                   |              |       |         |    | K.YIYTIDDDCFVAK.D                  | 99.70%                                    | 56.7   | 44.2 | 43.2 | 0    | 2 | 0 | 0  |   |
| 1095  | Malate dehydrogenase              | gi 350536645 | 36152 | 100.00% | 4  | 15.00%                             | R.DDLFNINAGIVK.S                          | 99.70% | 57.4 | 42.3 | 36.9 | 0 | 1 | 0  | 0 |
|       |                                   |              |       |         |    | K.RTQDGGTEVVEAK.A                  | 97.80%                                    | 56.4   | 42.7 | 23.3 | 0    | 1 | 0 | 0  |   |
|       |                                   |              |       |         |    | R.TQDGGTEVVEAK.A                   | 99.70%                                    | 86.1   | 42.8 | 60.1 | 0    | 1 | 0 | 0  |   |
|       |                                   |              |       |         |    | K.YCPNALVMISNPVNSTVPIAAEVFKK.A     | 99.70%                                    | 62.3   | 43.4 | 46.7 | 0    | 0 | 1 | 0  |   |
| 1123a | Malate dehydrogenase              | gi 350536645 | 36152 | 100.00% | 5  | 21.70%                             | K.AGKGSMTLSIAYAGAIFADACLK.G               | 99.70% | 74.9 | 45.8 | 60.2 | 0 | 0 | 1  | 0 |
|       |                                   |              |       |         |    | R.DDLFNINAGIVK.S                   | 99.70%                                    | 71.5   | 42.3 | 49.7 | 0    | 3 | 0 | 0  |   |
|       |                                   |              |       |         |    | RTQDGGTEVVEAK.A                    | 99.70%                                    | 53.5   | 43.1 | 19.7 | 0    | 1 | 0 | 0  |   |
|       |                                   |              |       |         |    | R.TQDGGTEVVEAK.A                   | 99.70%                                    | 85.4   | 42.8 | 56.7 | 0    | 2 | 0 | 0  |   |
|       |                                   |              |       |         |    | K.YCPNALVMISNPVNSTVPIAAEVFKK.A     | 99.70%                                    | 55.3   | 43.3 | 44.1 | 0    | 0 | 3 | 0  |   |
| 1123b | Proline iminopeptidase            | gi 224060965 | 37404 | 100.00% | 4  | 11.50%                             | K.GFFPSDSFLENVDK.I                        | 99.70% | 65.6 | 44.3 | 46.8 | 0 | 3 | 0  | 0 |
|       |                                   |              |       |         |    | R.IENHYFVNK.G                      | 99.70%                                    | 49.1   | 42.3 | 21.8 | 0    | 2 | 0 | 0  |   |
|       |                                   |              |       |         |    | R.IILFDQR.G                        | 98.60%                                    | 35.5   | 39.3 | 0    | 0    | 1 | 0 | 0  |   |
|       |                                   |              |       |         |    | K.VTGLVLR.G                        | 96.00%                                    | 27.9   | 38.4 | 0    | 0    | 1 | 0 | 0  |   |
| 1153  | V-ATPase E subunit                | gi 3334410   | 26163 | 100.00% | 26 | 88.90%                             | K.ACVSHPDIVDDIHLPPAPTSYDSHELSCSGGVVMASR.D | 98.50% | 33.5 | 46.5 | 18.2 | 0 | 0 | 0  | 2 |
|       |                                   |              |       |         |    | K.AKQVDVRR.K                       | 96.40%                                    | 30.2   | 39.6 | 8.56 | 0    | 1 | 0 | 0  |   |
|       |                                   |              |       |         |    | K.ANEISVSAAEEFNIEKLQVVEAK.K        | 99.70%                                    | 49.3   | 44.3 | 0    | 0    | 0 | 1 | 0  |   |
|       |                                   |              |       |         |    | R.CREEDKHHVHR.V                    | 99.70%                                    | 42.3   | 44.2 | 29   | 0    | 0 | 3 | 16 |   |
|       |                                   |              |       |         |    | R.DGKIVFENTLDAR.L                  | 99.70%                                    | 64.6   | 43.4 | 36.9 | 0    | 3 | 2 | 0  |   |
|       |                                   |              |       |         |    | R.DGKIVFENTLDARLEVAFR.K            | 99.50%                                    | 38.5   | 41.9 | 24.2 | 0    | 0 | 1 | 0  |   |
|       |                                   |              |       |         |    | K.EAASKELLVSGDHHQYR.N              | 99.70%                                    | 54.3   | 43.9 | 44.3 | 0    | 0 | 1 | 0  |   |
|       |                                   |              |       |         |    | K.ELIVQSLLR.L                      | 99.70%                                    | 55.8   | 38.5 | 18.3 | 0    | 3 | 0 | 0  |   |
|       |                                   |              |       |         |    | K.ELLVSGDHHQYR.N                   | 99.70%                                    | 77.4   | 43.7 | 43.9 | 0    | 3 | 2 | 0  |   |
|       |                                   |              |       |         |    | K.ELLVSGDHHQYRNLLKELIVQSLLR.L      | 97.40%                                    | 25.5   | 32.8 | 17.5 | 0    | 0 | 0 | 2  |   |
|       |                                   |              |       |         |    | K.IEYSMQLNASR.I                    | 99.70%                                    | 72.9   | 43   | 41.7 | 0    | 3 | 0 | 0  |   |
|       |                                   |              |       |         |    | R.IKVLAQDDLVNAMK.E                 | 99.70%                                    | 100    | 40.6 | 0    | 0    | 5 | 3 | 0  |   |
|       |                                   |              |       |         |    | R.IKVLAQDDLVNAMKEAASK.E            | 99.70%                                    | 65.5   | 40.7 | 26.4 | 0    | 0 | 5 | 1  |   |
|       |                                   |              |       |         |    | K.IRQEYERK.A                       | 99.30%                                    | 35.8   | 41.3 | 14.3 | 0    | 0 | 1 | 0  |   |
|       |                                   |              |       |         |    | K.IVFENTLDAR.L                     | 99.70%                                    | 68     | 42.1 | 34.3 | 0    | 3 | 0 | 0  |   |
|       |                                   |              |       |         |    | R.KIEYSMQLNASR.I                   | 99.70%                                    | 97.8   | 43.1 | 81.6 | 0    | 3 | 3 | 0  |   |
|       |                                   |              |       |         |    | R.KKLPQIR.K                        | 99.00%                                    | 28.7   | 30.1 | 0    | 0    | 2 | 0 | 0  |   |
|       |                                   |              |       |         |    | R.LEVAFR.K                         | 98.40%                                    | 35.4   | 39.7 | 0    | 0    | 2 | 0 | 0  |   |
|       |                                   |              |       |         |    | R.LEVAFRK.K                        | 99.00%                                    | 37.6   | 39.4 | 14.1 | 0    | 3 | 0 | 0  |   |
|       |                                   |              |       |         |    | R.LKEPAVLLR.C                      | 99.70%                                    | 50.2   | 30.5 | 0    | 0    | 2 | 0 | 0  |   |
|       |                                   |              |       |         |    | K.LQLVEAEKK.K                      | 98.40%                                    | 35.8   | 40.1 | 0    | 0    | 1 | 0 | 0  |   |
|       |                                   |              |       |         |    | R.NLLKELIVQSLLR.L                  | 99.70%                                    | 69.8   | 31.8 | 33.8 | 0    | 3 | 3 | 0  |   |
|       |                                   |              |       |         |    | R.QEAEEKANEISVSAAEEFNIEKLQVVEAK.K  | 99.70%                                    | 49.7   | 45.3 | 0    | 0    | 0 | 0 | 2  |   |
|       |                                   |              |       |         |    | R.RKIEYSMQLNASR.I                  | 99.70%                                    | 60.4   | 42.6 | 41.3 | 0    | 1 | 5 | 2  |   |

|      |                                                                      |              |       |         |    |                                        |                              |        |      |      |      |    |   |   |   |
|------|----------------------------------------------------------------------|--------------|-------|---------|----|----------------------------------------|------------------------------|--------|------|------|------|----|---|---|---|
|      |                                                                      |              |       |         |    | R.VLHSAREEYGEK.A                       | 99.70%                       | 57.8   | 43.1 | 42.5 | 0    | 3  | 0 | 0 |   |
|      |                                                                      |              |       |         |    | K.VLQAQDDLNVAMK.E                      | 99.70%                       | 90.6   | 42.9 | 0    | 0    | 6  | 0 | 0 |   |
| 1307 | Ascorbate peroxidase                                                 | gi 239586448 | 18421 | 100.00% | 5  | 41.10%                                 | K.ALLSDPAFRPLVEK.Y           | 99.70% | 63   | 39.2 | 38.6 | 0  | 2 | 0 | 0 |
|      |                                                                      |              |       |         |    | K.ELLSGEKEGLQLPSDK.A                   | 99.70%                       | 51.4   | 41.3 | 0    | 0    | 0  | 2 | 0 |   |
|      |                                                                      |              |       |         |    | K.ELLSGEKEGLQLPSDKALLSDPAFRPLVEK.Y     | 99.70%                       | 42.2   | 36.4 | 0.88 | 0    | 0  | 0 | 1 |   |
|      |                                                                      |              |       |         |    | K.QMGLSDKDIVALSAGHTLGR.C               | 99.70%                       | 59.8   | 43.6 | 28.6 | 0    | 0  | 3 | 2 |   |
|      |                                                                      |              |       |         |    | K.YAADEDAFFADYAEHLK.L                  | 99.70%                       | 64.6   | 47.2 | 51.1 | 0    | 1  | 3 | 0 |   |
| 1325 | Fructose-biphosphate aldolase                                        | gi 2213867   | 38158 | 100.00% | 8  | 20.70%                                 | K.ALNDHHVLEGTLLKPNMVTGSESK.K | 99.70% | 62.1 | 42.3 | 49   | 0  | 0 | 0 | 3 |
|      |                                                                      |              |       |         |    | K.ALNDHHVLEGTLLKPNMVTGSESK.V           | 99.30%                       | 37     | 40.9 | 29.3 | 0    | 0  | 0 | 0 |   |
|      |                                                                      |              |       |         |    | R.CAEVTER.V                            | 96.80%                       | 30.6   | 39.2 | 5.56 | 0    | 3  | 0 | 0 |   |
|      |                                                                      |              |       |         |    | R.CAQYAAAGAR.F                         | 99.70%                       | 67.6   | 42   | 44   | 0    | 3  | 0 | 0 |   |
|      |                                                                      |              |       |         |    | K.KPWTLFSYGR.A                         | 98.80%                       | 42.9   | 44.2 | 21.2 | 0    | 1  | 3 | 0 |   |
|      |                                                                      |              |       |         |    | K.KVAPEVIAEYTVR.A                      | 99.70%                       | 54.6   | 40.8 | 35   | 0    | 2  | 3 | 0 |   |
|      |                                                                      |              |       |         |    | K.VAPEVIAEYTVR.A                       | 99.70%                       | 61.7   | 41.7 | 36.9 | 0    | 2  | 0 | 0 |   |
|      |                                                                      |              |       |         |    | R.VLAACYK.A                            | 98.70%                       | 40     | 42.1 | 0    | 0    | 2  | 0 | 0 |   |
| 1501 | Alpha-galactosidase-like protein                                     | gi 297816956 | 47551 | 100.00% | 3  | 10.70%                                 | K.APLIGCDVR.N                | 99.70% | 52.7 | 39.6 | 0    | 0  | 2 | 0 | 0 |
|      |                                                                      |              |       |         |    | K.EVIAVNQDPLGVQGR.K                    | 99.70%                       | 82.9   | 41.4 | 67.3 | 0    | 1  | 1 | 0 |   |
|      |                                                                      |              |       |         |    | R.TTDDINDTWASMTTIADLNK.W               | 99.50%                       | 53.6   | 45.8 | 0    | 0    | 0  | 1 | 0 |   |
| 1502 | 5-Methyltetrahydropteroyltri-glutamyl-homocysteine methyltransferase | gi 8134568   | 84824 | 100.00% | 62 | 66.10%                                 | K.AATALKGSDHR.R              | 97.40% | 39   | 40.3 | 17.3 | 0  | 1 | 0 | 0 |
|      |                                                                      |              |       |         |    | K.AGINVIQIDEAALR.E                     | 99.70%                       | 73.4   | 39   | 45.4 | 0    | 3  | 3 | 0 |   |
|      |                                                                      |              |       |         |    | K.AGINVIQIDEAALREGLPLR.K               | 99.70%                       | 47.4   | 37   | 33.7 | 0    | 0  | 3 | 0 |   |
|      |                                                                      |              |       |         |    | K.AGINVIQIDEAALREGLPLR.K.S             | 99.70%                       | 56.2   | 33.5 | 52   | 0    | 0  | 2 | 3 |   |
|      |                                                                      |              |       |         |    | K.AIKEEISKVVK.L                        | 99.70%                       | 44.4   | 34.2 | 31.6 | 0    | 3  | 3 | 0 |   |
|      |                                                                      |              |       |         |    | K.AKKISEEEYVK.A                        | 99.70%                       | 52.4   | 41.1 | 39.7 | 0    | 0  | 2 | 0 |   |
|      |                                                                      |              |       |         |    | K.ALGVDTVPVLVGPVSYLLSK.Q               | 99.70%                       | 63.2   | 31.2 | 48.7 | 0    | 3  | 6 | 0 |   |
|      |                                                                      |              |       |         |    | K.ALSGQKDEAFFSANAAALASR.K              | 99.70%                       | 112    | 44.4 | 97.7 | 0    | 3  | 2 | 1 |   |
|      |                                                                      |              |       |         |    | K.ALSGQKDEAFFSANAAALASR.K.S            | 99.70%                       | 82.5   | 43.1 | 68.7 | 0    | 0  | 3 | 1 |   |
|      |                                                                      |              |       |         |    | R.ATTVSSRLDAQQK.K                      | 98.60%                       | 48.3   | 42.3 | 19.2 | 0    | 2  | 0 | 0 |   |
|      |                                                                      |              |       |         |    | K.AVLEYK.E                             | 99.20%                       | 43.5   | 36.4 | 0    | 0    | 3  | 0 | 0 |   |
|      |                                                                      |              |       |         |    | K.AVLEYKEAK.A                          | 99.70%                       | 64.4   | 40.5 | 0    | 0    | 3  | 0 | 0 |   |
|      |                                                                      |              |       |         |    | K.DEAFFSANAAALASR.K                    | 99.70%                       | 89.5   | 44.9 | 0    | 0    | 1  | 0 | 0 |   |
|      |                                                                      |              |       |         |    | R.EGLPLR.K.S                           | 96.70%                       | 33.5   | 36.4 | 10.9 | 0    | 2  | 0 | 0 |   |
|      |                                                                      |              |       |         |    | R.EGVKYGAGIGPGVYDIHSPR.I               | 99.70%                       | 65.5   | 44.2 | 58   | 0    | 0  | 3 | 0 |   |
|      |                                                                      |              |       |         |    | K.FALESFWDGK.S                         | 99.70%                       | 57     | 42.4 | 37.2 | 0    | 3  | 0 | 0 |   |
|      |                                                                      |              |       |         |    | K.FALESFWDGKSTAEDLK.K                  | 99.70%                       | 43.2   | 44.9 | 2.02 | 0    | 0  | 1 | 0 |   |
|      |                                                                      |              |       |         |    | K.FALESFWDGKSTAEDLKK.V                 | 99.70%                       | 87.2   | 44.4 | 72.4 | 0    | 1  | 3 | 1 |   |
|      |                                                                      |              |       |         |    | K.GMLTGPVTILNWSFVR.N                   | 99.70%                       | 111    | 41.8 | 0    | 0    | 6  | 1 | 0 |   |
|      |                                                                      |              |       |         |    | R.GNASVPAMEMTK.W                       | 99.70%                       | 72.4   | 42   | 24.2 | 0    | 10 | 0 | 0 |   |
|      |                                                                      |              |       |         |    | R.GTKTLDLVKAEFPGK.Y                    | 99.70%                       | 39.7   | 40   | 20.6 | 0    | 0  | 1 | 0 |   |
|      |                                                                      |              |       |         |    | K.GVDKSFDLLSLPK.I                      | 99.70%                       | 55.8   | 38.3 | 12.6 | 0    | 2  | 3 | 0 |   |
|      |                                                                      |              |       |         |    | K.GVTGYGFDLVR.G                        | 99.70%                       | 79.1   | 41.6 | 57.2 | 0    | 3  | 0 | 0 |   |
|      |                                                                      |              |       |         |    | R.HETCYQJALAIKNEVEDLEK.A               | 99.70%                       | 71     | 44.6 | 58.4 | 0    | 1  | 3 | 3 |   |
|      |                                                                      |              |       |         |    | R.HETCYQJALAIKNEVEDLEKAGINVIQIDEAALR.E | 99.70%                       | 71.3   | 41.8 | 62.8 | 0    | 0  | 0 | 2 |   |
|      |                                                                      |              |       |         |    | K.ILPIYKEVVAELK.E                      | 99.70%                       | 50.2   | 32.7 | 34.5 | 0    | 3  | 3 | 0 |   |
|      |                                                                      |              |       |         |    | R.IPTEELADR.I                          | 99.70%                       | 77     | 41.2 | 0    | 0    | 4  | 0 | 0 |   |
|      |                                                                      |              |       |         |    | R.IPTEELADR.I.K                        | 99.30%                       | 48     | 40.1 | 0    | 0    | 3  | 0 | 0 |   |
|      |                                                                      |              |       |         |    | K.ISEEEYVK.A                           | 99.70%                       | 59.1   | 43   | 36.9 | 0    | 3  | 0 | 0 |   |
|      |                                                                      |              |       |         |    | K.KISEEEYVK.A                          | 99.70%                       | 51.6   | 42.2 | 17.9 | 0    | 3  | 3 | 0 |   |
|      |                                                                      |              |       |         |    | K.KLNLPILPPTTTIGSFQTVELR.R             | 99.70%                       | 68.9   | 33.4 | 11.8 | 0    | 3  | 1 | 0 |   |
|      |                                                                      |              |       |         |    | K.KLNLPILPPTTTIGSFQTVELRR.V            | 99.70%                       | 35.6   | 31.1 | 0    | 0    | 0  | 3 | 0 |   |
|      |                                                                      |              |       |         |    | R.KMLAVLESNVLWVNPDCGLK.T               | 99.70%                       | 81.6   | 42.9 | 69.6 | 0    | 3  | 3 | 0 |   |

|      |                           |              |       |         |    |                                   |                          |        |      |      |      |    |   |   |   |
|------|---------------------------|--------------|-------|---------|----|-----------------------------------|--------------------------|--------|------|------|------|----|---|---|---|
|      |                           |              |       |         |    | R.KSEHDFYLK.W                     | 99.70%                   | 58.7   | 43.3 | 28.5 | 0    | 3  | 0 | 0 |   |
|      |                           |              |       |         |    | R.KYGEVNPALSNMVAQK.Q              | 99.70%                   | 106    | 42.7 | 82   | 0    | 6  | 6 | 0 |   |
|      |                           |              |       |         |    | K.LDDEIKSWLAFQK.V                 | 99.70%                   | 44.1   | 43.1 | 0    | 0    | 0  | 1 | 0 |   |
|      |                           |              |       |         |    | K.LLSVFR.E                        | 99.00%                   | 40.7   | 35.4 | 0    | 0    | 3  | 0 | 0 |   |
|      |                           |              |       |         |    | K.LLSVFREGVK.Y                    | 99.70%                   | 60.2   | 37   | 0    | 0    | 1  | 0 | 0 |   |
|      |                           |              |       |         |    | K.LNLPILPTTTIGSFQTVLR.R           | 99.70%                   | 66.5   | 35.5 | 10.4 | 0    | 0  | 2 | 0 |   |
|      |                           |              |       |         |    | K.LNLPILPTTTIGSFQTVLRR.V          | 99.70%                   | 41.6   | 33.9 | 0.99 | 0    | 0  | 2 | 0 |   |
|      |                           |              |       |         |    | K.LQEELDIDVLVHGEPEP.N             | 99.70%                   | 69.3   | 44.1 | 0    | 0    | 0  | 3 | 0 |   |
|      |                           |              |       |         |    | K.MLAVLESNVLWVNPDCGLK.T           | 99.70%                   | 65.4   | 44   | 45.9 | 0    | 3  | 3 | 0 |   |
|      |                           |              |       |         |    | R.NDQPRHETCYQJALAIK.N             | 99.70%                   | 62.7   | 44.8 | 46.9 | 0    | 0  | 3 | 0 |   |
|      |                           |              |       |         |    | R.NDQPRHETCYQJALAIKNEVEDLEK.A     | 99.70%                   | 74.6   | 45.8 | 49.3 | 0    | 0  | 2 | 3 |   |
|      |                           |              |       |         |    | R.NIWANDLAASLATLEALEGVVGK.D       | 99.70%                   | 52.4   | 40.8 | 43.6 | 0    | 0  | 1 | 0 |   |
|      |                           |              |       |         |    | R.NIWANDLAASLATLEALEGVVGKDK.L     | 99.70%                   | 130    | 40.4 | 90.6 | 0    | 2  | 3 | 0 |   |
|      |                           |              |       |         |    | K.QLRQELASAK                      | 99.70%                   | 61     | 40.9 | 37   | 0    | 3  | 3 | 0 |   |
|      |                           |              |       |         |    | K.QMADAGIK.Y                      | 99.60%                   | 59.2   | 41   | 18.6 | 0    | 6  | 0 | 0 |   |
|      |                           |              |       |         |    | R.RATTVSSR.L                      | 96.00%                   | 31.7   | 40.6 | 7.64 | 0    | 6  | 0 | 0 |   |
|      |                           |              |       |         |    | R.SDEKLLSVFR.E                    | 99.70%                   | 64     | 41.6 | 0    | 0    | 3  | 3 | 0 |   |
|      |                           |              |       |         |    | K.SEHDFYLK.W                      | 97.90%                   | 41.7   | 41.5 | 24.5 | 0    | 3  | 0 | 0 |   |
|      |                           |              |       |         |    | K.SFDLLSLPK.I                     | 99.70%                   | 68.2   | 39.3 | 40   | 0    | 3  | 0 | 0 |   |
|      |                           |              |       |         |    | K.SWLAFQK.V                       | 99.70%                   | 55.9   | 46   | 0    | 0    | 2  | 0 | 0 |   |
|      |                           |              |       |         |    | K.TLDLVKAEFPGK.Y                  | 99.70%                   | 83.5   | 43.7 | 65.9 | 0    | 3  | 3 | 0 |   |
|      |                           |              |       |         |    | K.TLDLVKAEFPGKYLFGVVDGR.N         | 99.70%                   | 53.1   | 40.1 | 29.9 | 0    | 0  | 0 | 1 |   |
|      |                           |              |       |         |    | K.TLISLKGVTGYGFDLVR.G             | 99.70%                   | 76.3   | 37.9 | 63.4 | 0    | 1  | 3 | 0 |   |
|      |                           |              |       |         |    | K.VLEVNALAK.A                     | 99.70%                   | 54.8   | 40.2 | 5.3  | 0    | 2  | 0 | 0 |   |
|      |                           |              |       |         |    | K.WFDTNHYFIVPELGPVNFYASHK.A       | 99.70%                   | 75.4   | 45.9 | 19.2 | 0    | 0  | 3 | 0 |   |
|      |                           |              |       |         |    | K.YGAGIGPGVYDIHSPR.I              | 99.70%                   | 105    | 44   | 85.7 | 0    | 3  | 3 | 0 |   |
|      |                           |              |       |         |    | K.YGEVNPALSNMVAQK.Q               | 99.70%                   | 90.5   | 43.6 | 76.2 | 0    | 6  | 0 | 0 |   |
|      |                           |              |       |         |    | K.YIPSNFYSYDQVLDTTAMLGAVPPR.Y     | 99.00%                   | 47.8   | 45.4 | 3.41 | 0    | 0  | 1 | 0 |   |
|      |                           |              |       |         |    | K.YLFGVVDGR.N                     | 99.70%                   | 55.1   | 42.2 | 24.6 | 0    | 3  | 0 | 0 |   |
| 1503 | Triosephosphate isomerase | gi 388507284 | 33452 | 100.00% | 5  | 23.10%                            | K.FFVGGNWK.C             | 95.50% | 31.9 | 41.3 | 12.9 | 0  | 3 | 0 | 0 |
|      |                           |              |       |         |    | R.HVIGKDEFIGK.K                   | 99.70%                   | 47.1   | 41.7 | 35.3 | 0    | 1  | 2 | 0 |   |
|      |                           |              |       |         |    | R.HVIGKDEFIGK.K.A                 | 99.70%                   | 47     | 40.7 | 32.9 | 0    | 1  | 3 | 3 |   |
|      |                           |              |       |         |    | K.KAAYALSEGLGVIAICIGELLEER.E      | 99.70%                   | 67.9   | 41.2 | 54.3 | 0    | 0  | 1 | 0 |   |
|      |                           |              |       |         |    | K.KEDIDGFLVGGASLKGPEFATVNSVTSK.K  | 99.70%                   | 46.4   | 41   | 1.71 | 0    | 0  | 0 | 3 |   |
| 1508 | V-ATPase A subunit        | gi 13235340  | 68900 | 100.00% | 54 | 85.90%                            | K.AREVLQREDDLNEIVQLVGK.D | 99.70% | 70.2 | 39.5 | 53.1 | 0  | 0 | 3 | 2 |
|      |                           |              |       |         |    | R.DMGYNVSMMDSTSR.W                | 99.70%                   | 107    | 41.6 | 14.4 | 0    | 14 | 4 | 0 |   |
|      |                           |              |       |         |    | R.EASIYTGITIAEYFR.D               | 99.70%                   | 106    | 42.8 | 0    | 0    | 3  | 3 | 0 |   |
|      |                           |              |       |         |    | R.EASIYTGITIAEYFRDMGYNVSMMDSTSR.W | 99.70%                   | 70.6   | 46.9 | 0    | 0    | 0  | 4 | 2 |   |
|      |                           |              |       |         |    | R.EDDLNEIVQLVGK.D                 | 99.70%                   | 88.4   | 43.6 | 69.4 | 0    | 2  | 0 | 0 |   |
|      |                           |              |       |         |    | K.EFTMLQSWPVR.T                   | 99.20%                   | 53.7   | 42.7 | 33.3 | 0    | 5  | 0 | 0 |   |
|      |                           |              |       |         |    | R.EVLQREDDLNEIVQLVGK.D            | 99.70%                   | 56.2   | 45.4 | 35.8 | 0    | 3  | 3 | 0 |   |
|      |                           |              |       |         |    | K.FDPDFINIR.T                     | 99.40%                   | 54.7   | 41.9 | 32.1 | 0    | 3  | 0 | 0 |   |
|      |                           |              |       |         |    | K.FEDPAEGEDTLVAK.F                | 99.70%                   | 96.2   | 43.2 | 44.3 | 0    | 3  | 0 | 0 |   |
|      |                           |              |       |         |    | K.FQKLYEDLSAAR.N                  | 99.70%                   | 47.8   | 42.5 | 23.4 | 0    | 3  | 3 | 0 |   |
|      |                           |              |       |         |    | R.GAGSDGQKITYSLIK.L               | 99.70%                   | 75     | 40.6 | 20.7 | 0    | 3  | 3 | 0 |   |
|      |                           |              |       |         |    | R.GAGSDGQKITYSLIKR.L              | 99.70%                   | 45.4   | 37.4 | 31.5 | 0    | 0  | 1 | 0 |   |
|      |                           |              |       |         |    | R.GNEMAEVLMDFPQLTMTLPDGR.E        | 99.70%                   | 90.5   | 46.2 | 77.7 | 0    | 2  | 0 | 0 |   |
|      |                           |              |       |         |    | R.GNEMAEVLMDFPQLTMTLPDGREESVMK.R  | 99.70%                   | 74.2   | 46.4 | 57.7 | 0    | 0  | 3 | 0 |   |
|      |                           |              |       |         |    | R.GNEMAEVLMDFPQLTMTLPDGREESVMKR.T | 99.70%                   | 63.8   | 46.3 | 37   | 0    | 0  | 4 | 2 |   |
|      |                           |              |       |         |    | R.GVAVPPLDKDALWFEFEPK.K           | 99.70%                   | 44.4   | 41.4 | 32.4 | 0    | 3  | 3 | 0 |   |
|      |                           |              |       |         |    | R.GVAVPPLDKDALWFEFEPK.I           | 98.50%                   | 30.2   | 39.3 | 17   | 0    | 0  | 2 | 0 |   |
|      |                           |              |       |         |    | K.HFPSVNWLSYSK.Y                  | 99.70%                   | 48.8   | 42.4 | 21.5 | 0    | 3  | 3 | 0 |   |
|      |                           |              |       |         |    | K.ITYIAPPGQYSIQDTVLELEFQGVK.K     | 99.70%                   | 49.3   | 40.1 | 0    | 0    | 0  | 2 | 0 |   |
|      |                           |              |       |         |    | K.ITYIAPPGQYSIQDTVLELEFQGVK.E     | 99.70%                   | 48.5   | 38.5 | 0    | 0    | 0  | 2 | 1 |   |
|      |                           |              |       |         |    | K.KEFTMLQSWPVR.T                  | 99.70%                   | 71.6   | 42.7 | 55.1 | 0    | 2  | 2 | 0 |   |



|                                              |        |      |      |      |   |   |   |   |
|----------------------------------------------|--------|------|------|------|---|---|---|---|
| R.KHFPSVNWLSYSK.Y                            | 99.70% | 76.7 | 41   | 53.4 | 0 | 3 | 3 | 1 |
| K.KIGEDLLTGGDLYAK.V                          | 99.70% | 75.3 | 41.2 | 57.4 | 0 | 3 | 3 | 0 |
| R.KVSGPVVADGMNGAAMYELVR.V                    | 99.70% | 66.9 | 43.8 | 32.2 | 0 | 1 | 7 | 0 |
| K.LAADTPLLTGQR.V                             | 99.70% | 83.1 | 38.9 | 60.9 | 0 | 3 | 3 | 0 |
| R.LAEMPADSGYPAYLAAR.L                        | 99.70% | 104  | 44   | 80.6 | 0 | 3 | 2 | 0 |
| R.LASFYER.A                                  | 99.10% | 49.7 | 40.5 | 16.9 | 0 | 2 | 0 | 0 |
| R.LEGDSATIQQVYEETAGLMVNDPVL.R.T              | 99.70% | 75.6 | 44.5 | 63.4 | 0 | 1 | 3 | 0 |
| R.LGDLFYR.L                                  | 99.40% | 53.5 | 40.9 | 15.5 | 0 | 3 | 0 | 0 |
| K.LLREDYLAQNAFTPYDK.F                        | 99.70% | 44.5 | 43.9 | 29.1 | 0 | 0 | 1 | 0 |
| K.LRLGDLFYR.L                                | 99.70% | 34.4 | 37.8 | 9.32 | 0 | 1 | 3 | 0 |
| R.LTTFEDSEKESEGYIR.K                         | 99.70% | 76.8 | 45   | 67.5 | 0 | 3 | 1 | 0 |
| R.LTTFEDSEKESEGYIRK.V                        | 99.40% | 49   | 45.5 | 38.7 | 0 | 0 | 3 | 0 |
| R.LVSQKFEDPAEGEDTLVAK.F                      | 99.70% | 53.5 | 43.2 | 21.9 | 0 | 3 | 3 | 0 |
| K.LYEDLSAAFR.N                               | 99.70% | 76.4 | 45.5 | 34   | 0 | 3 | 0 | 0 |
| M.PAVYGDRLTTFEDSEKESEGYIR.K                  | 99.40% | 42.5 | 45.6 | 30.1 | 0 | 0 | 0 | 2 |
| K.RSGDVYIPR.G                                | 98.90% | 45.2 | 41.5 | 20.7 | 0 | 3 | 0 | 0 |
| K.RTTLVANTSNMPVAAR.E                         | 99.70% | 83.7 | 42.4 | 63   | 0 | 1 | 4 | 0 |
| R.SGDVYIPR.G                                 | 99.10% | 55.1 | 40.5 | 21.5 | 0 | 3 | 0 | 0 |
| R.TGSVTIVGAVSPPGGDFSDPVTSATLSIVQVFWGLDKK.L   | 99.70% | 68.9 | 38.4 | 58.2 | 0 | 0 | 1 | 0 |
| R.THKPLSVELGPGILGNIFDGIQRPLK.T               | 99.70% | 63.6 | 30.9 | 62   | 0 | 0 | 2 | 4 |
| R.THKPLSVELGPGILGNIFDGIQRPLKTIAK.R           | 99.70% | 56.6 | 31.9 | 45.8 | 0 | 0 | 0 | 2 |
| R.THKPLSVELGPGILGNIFDGIQRPLKTIAKR.S          | 99.70% | 56.1 | 34.3 | 52.6 | 0 | 0 | 0 | 3 |
| R.TTLVANTSNMPVAAR.E                          | 99.70% | 101  | 42.9 | 76   | 0 | 6 | 6 | 0 |
| K.TVISQALS.K.Y                               | 99.70% | 61   | 39.4 | 31.3 | 0 | 3 | 0 | 0 |
| K.TVISQALS.KYSNSDAVVYVGCGER.G                | 99.70% | 56.2 | 44.2 | 8.33 | 0 | 0 | 2 | 0 |
| R.VGYDNLIGEII.R.L                            | 99.70% | 84.9 | 40.3 | 57.7 | 0 | 3 | 2 | 0 |
| R.VGYDNLIGEIIIRLEGDSATIQQVYEETAGLMVNDPVL.R.T | 99.70% | 82.3 | 40.9 | 70.1 | 0 | 0 | 0 | 1 |
| K.VKCLGGPER.T                                | 96.60% | 39.1 | 42.2 | 5.59 | 0 | 1 | 0 | 0 |
| R.VLDALFPSVLGGTCAIPGAFGCGK.T                 | 99.70% | 104  | 43.3 | 90.1 | 0 | 3 | 3 | 0 |
| K.VSGPVVADGMNGAAMYELVR.V                     | 99.70% | 117  | 43.7 | 98.7 | 0 | 3 | 5 | 0 |
| R.WAEALREISGR.L                              | 98.00% | 46.6 | 41.6 | 23.1 | 0 | 3 | 0 | 0 |
| K.YSNSDAVVYVGCGER.G                          | 99.70% | 84.1 | 43.5 | 11.8 | 0 | 3 | 0 | 0 |
| K.YTSALETFYEKFDPDFINIR.T                     | 99.70% | 67.1 | 44.5 | 59.7 | 0 | 1 | 3 | 0 |
