# Supplementary material for: Single-cell-type quantitative proteomic and ionomic analysis of epidermal bladder cells from the halophyte model plant Mesembryanthemum crystallinum to identify salt-responsive proteins
Source: PubMed Central journal article supplement (PMC4862212; doi:10.1186/s12870-016-0797-1), 2016-05-10

**Additional file 3.** SDS-PAGE separated total proteins isolated from EBC extract. Total EBC protein from three biological replicates for control (left gel) and salt-treated (right gel) were separated on 10% SDS-PAGE mini-gels and stained with Coomassie Brilliant Blue R-250 (CBB) dye. Letters on the right represent the gel pieces that were subjected to protein identification by LC-MS/MS. Numbers on the left are protein molecular masses (kDa) determined by molecular weight markers. The protein band corresponding to cysteine protease is indicated with the \* symbol.

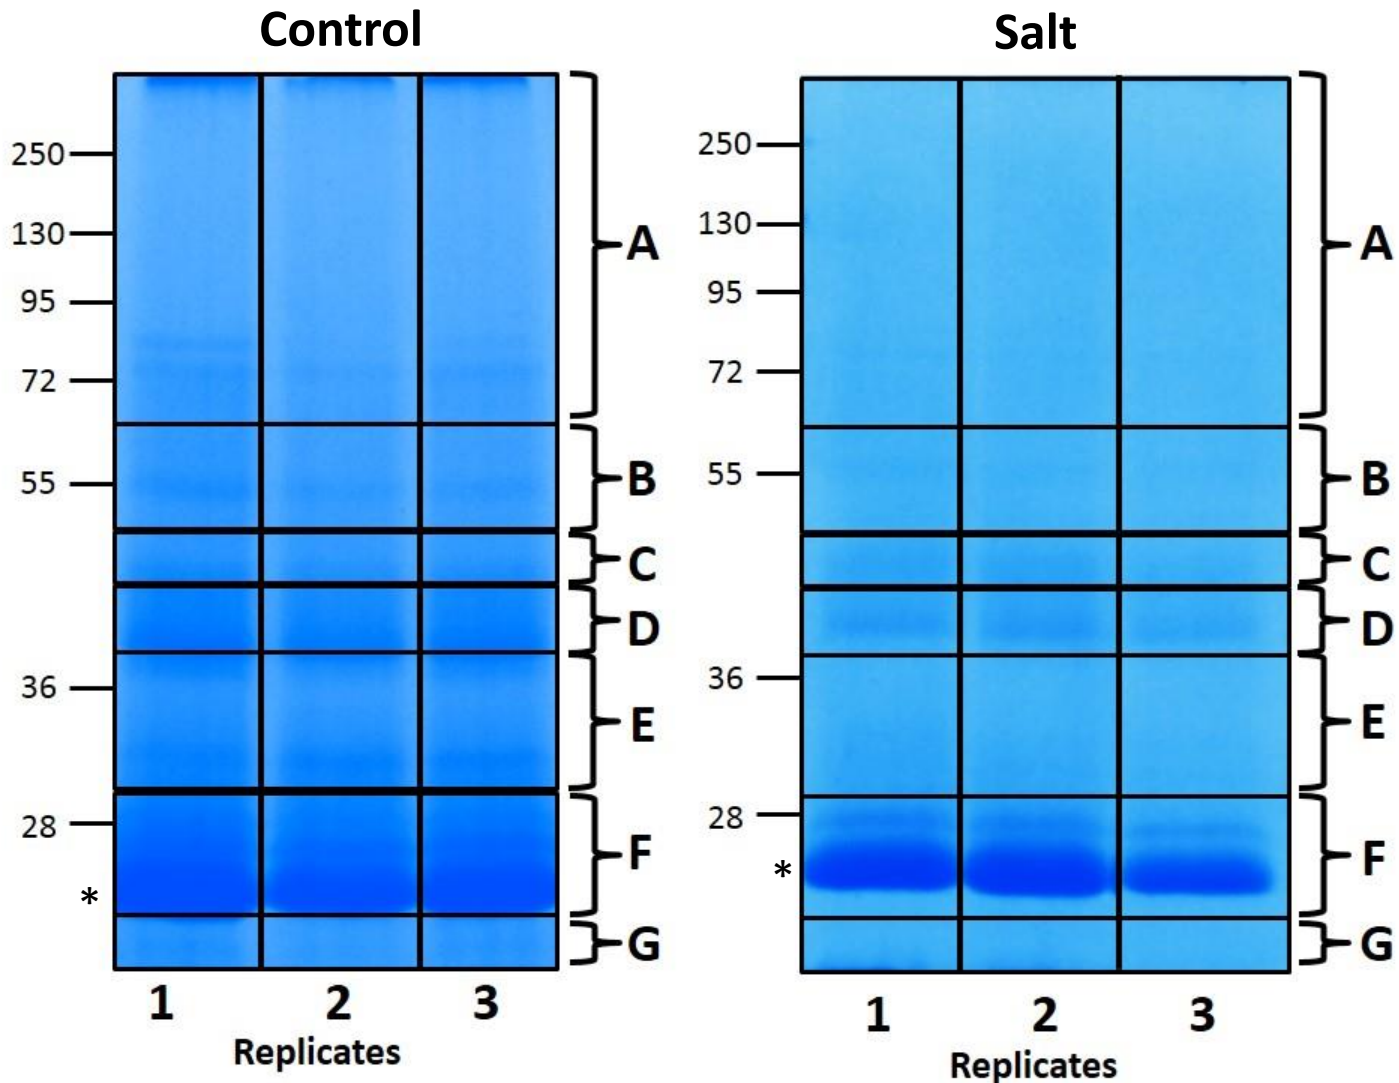

Supplement: 12870_2016_797_MOESM3_ESM.pdf [file 12870_2016_797_MOESM3_ESM.pdf]
