# Supplementary material for: Single-cell-type quantitative proteomic and ionomic analysis of epidermal bladder cells from the halophyte model plant Mesembryanthemum crystallinum to identify salt-responsive proteins
Source: PubMed Central journal article supplement (PMC4862212; doi:10.1186/s12870-016-0797-1), 2016-05-10
Supplement: 12870_2016_797_MOESM5_ESM.pdf [file 12870_2016_797_MOESM5_ESM.pdf]

**Additional file 5.** DIGE experimental design.

| Gel # | CyDye     |           |                                                       | Protein/IEF gel strip |
|-------|-----------|-----------|-------------------------------------------------------|-----------------------|
|       | Cy3       | Cy5       | Cy2<br>(internal standard pool)                       |                       |
| 1     | 50 µg BC1 | 50 µg BS1 | 6.25 µg each of<br>BC1+BC2+BC3+BC4<br>BS1+BS2+BS3+BS4 | 150 µg                |
| 2     | 50 µg BC2 | 50 µg BS2 | 6.25 µg each of<br>BC1+BC2+BC3+BC4<br>BS1+BS2+BS3+BS4 | 150 µg                |
| 3     | 50 µg BS3 | 50 µg BC3 | 6.25 µg each of<br>BC1+BC2+BC3+BC4<br>BS1+BS2+BS3+BS4 | 150 µg                |
| 4     | 50 µg BS4 | 50 µg BC4 | 6.25 µg each of<br>BC1+BC2+BC3+BC4<br>BS1+BS2+BS3+BS4 | 150 µg                |

BC1 – control sample 1, BC2 – control sample 2, BC3 – control sample 3, BC4 – control sample 4

BS1 – salt-treated sample 1, BS2 - salt-treated sample 2, BS3 - salt-treated sample 3, BS4 – salt-treated sample 4
