# Supplementary material for: Single-cell-type quantitative proteomic and ionomic analysis of epidermal bladder cells from the halophyte model plant Mesembryanthemum crystallinum to identify salt-responsive proteins
Source: PubMed Central journal article supplement (PMC4862212; doi:10.1186/s12870-016-0797-1), 2016-05-10
Supplement: 12870_2016_797_MOESM6_ESM.pdf [file 12870_2016_797_MOESM6_ESM.pdf]

**Additional file 6.** Gel Scanning Parameters used for the Typhoon scanner.

| <b>CyDye</b> | <b>Emission filter (nm)<br/>/Band Pass</b> | <b>Laser<br/>(nm)</b> | <b>Resolution<br/>(<math>\mu\text{m}</math>)</b> | <b>PMT<sup>a</sup><br/>(V)</b> |
|--------------|--------------------------------------------|-----------------------|--------------------------------------------------|--------------------------------|
| Cy 2         | 520/40                                     | Blue 488              | 100                                              | 600                            |
| Cy 3         | 580/30                                     | Green 532             | 100                                              | 600                            |
| Cy 5         | 670/30                                     | Red 633               | 100                                              | 600                            |

<sup>a</sup>Photomultiplier tube voltage
